# Supplementary material for: Small molecule screen in embryonic zebrafish using modular variations to target segmentation
Source: PubMed Central journal article supplement (PMC5711842; doi:10.1038/s41467-017-01469-5), 2017-12-01
Supplement: 41467_2017_1469_MOESM1_ESM.pdf [file 41467_2017_1469_MOESM1_ESM.pdf]

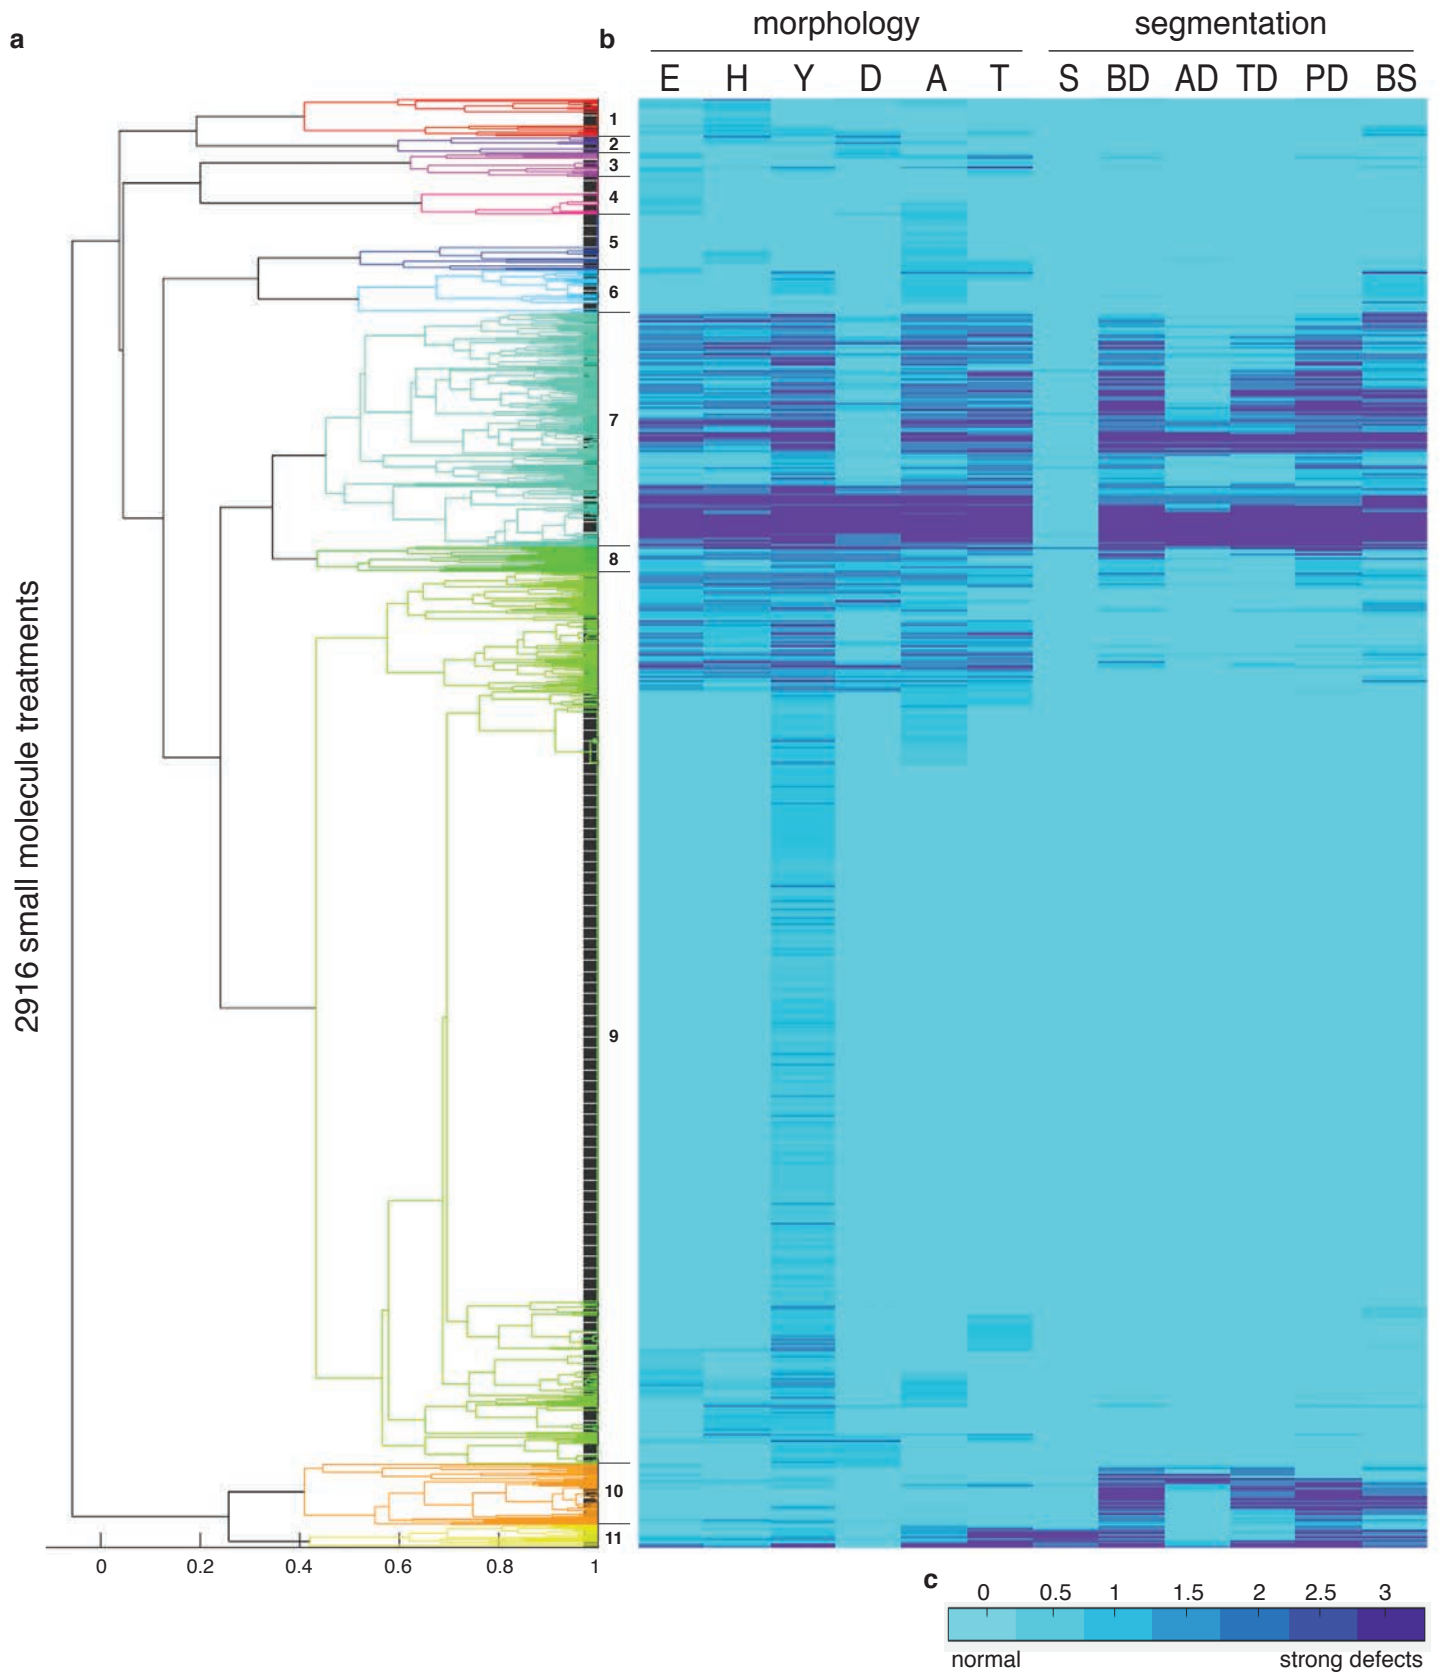

### Supplementary figure 1. Hierarchical clustering of all treatments

(a) A dendrogram of phenotypic vectors clustered by their similarity. All 2916 small molecule treatments were clustered on the basis of their morphological and segmentation parameters. We found 11 different clusters of phenotypes (correlation cutoff of 0.6), indicated by coloured branches of the dendrogram and corresponding numbers. The three clusters of interest discussed in the main text are numbered 7, 10 and 11. (b) Criteria for phenotypic scoring based on morphological (embryonic development [E], head region [H], yolk [Y], dorsal-ventral development [D], axis elongation [A], tail shape [T]) and segmentation parameters (secondary tail appendage [S], myotome boundary defects [BD], anterior myotome defects [AD], trunk myotome defects [TD], posterior myotome defects [PD], myotome boundary shape [BS]). Each are rated from 0 to 3 (normal to strong difference) compared to untreated controls. Numerical parameter score converted into a colour scale bar (c). All parameters together generate a phenotypic vector for each treatment. Horizontal position of each treatment in the dendrogram (a) corresponds to a phenotypic vector at the same horizontal level in (b).

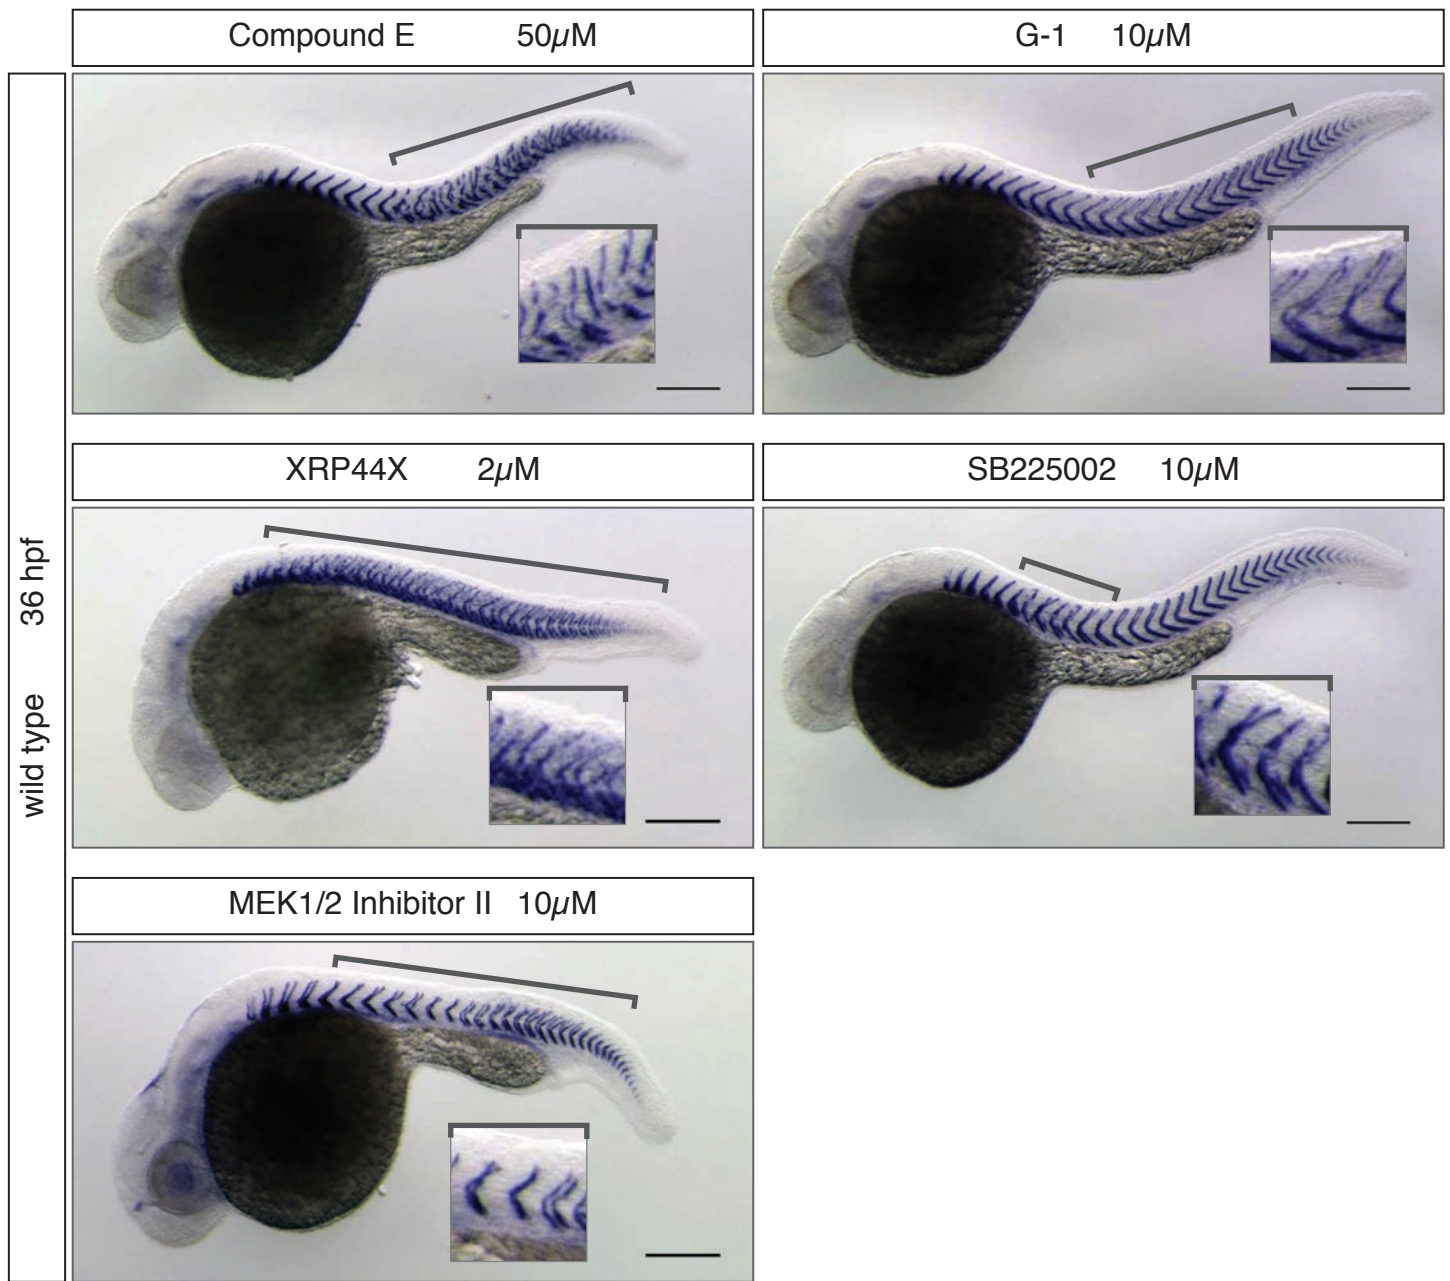

### Supplementary figure 2. 1st class segmentation phenotypes

Identified hit phenotypes with direct segmentation defects according to the classification used in Table 1, visible at 36 hpf after *xirp2a in situ* hybridization. All treatments are as labelled in the panel above the image. Anterior to the right, posterior to the left. Insets show zoom-in of the segment pattern and defects. Brackets indicate the area of the axis where segment boundary defects occurred.

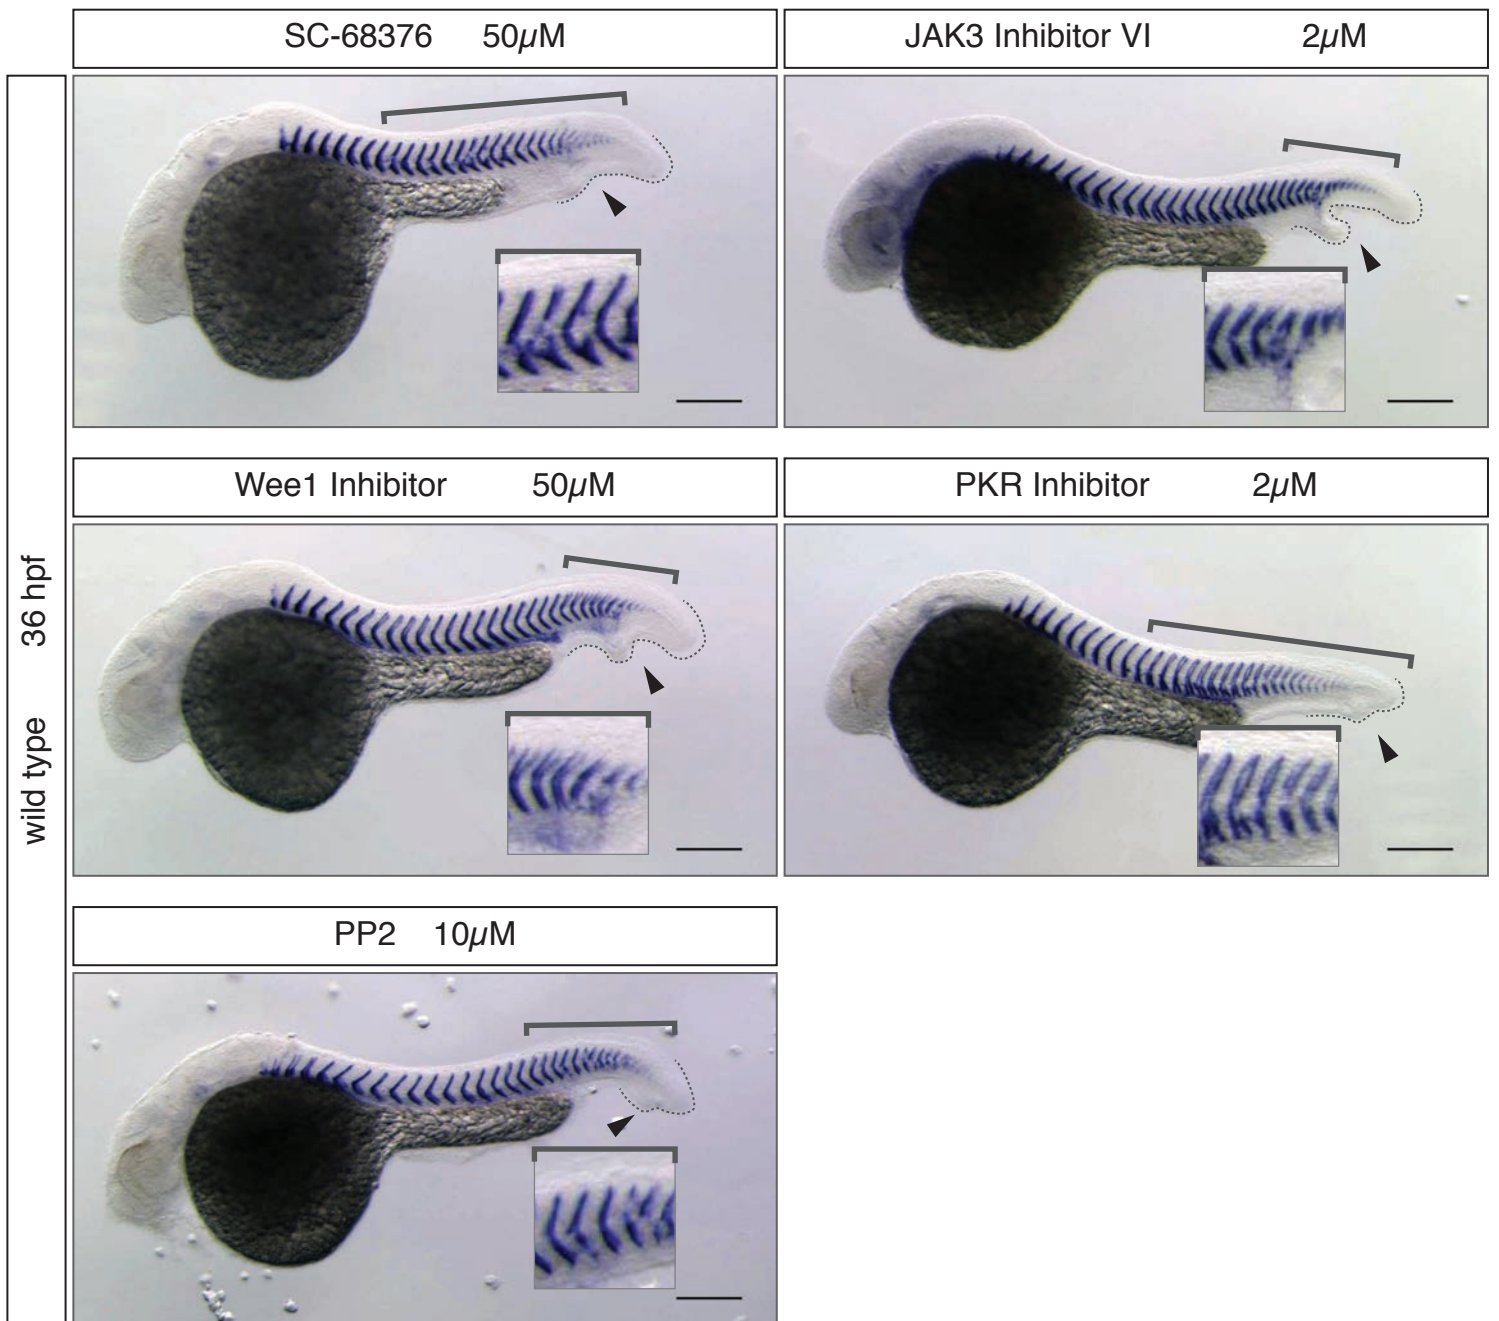

### Supplementary figure 3. Secondary tail appendage phenotypes

Identified hit phenotypes with direct segmentation defects according the classification used in Table 1, visible at 36 hpf after *xirp2a in situ* hybridization. All treatments are as labelled in the panel above the image. Anterior to the right, posterior to the left. Insets show zoom-in of the segment pattern and defects. Brackets indicate the area of the axis where segment boundary defects occurred. Dotted line outlines observed secondary tail appendage.



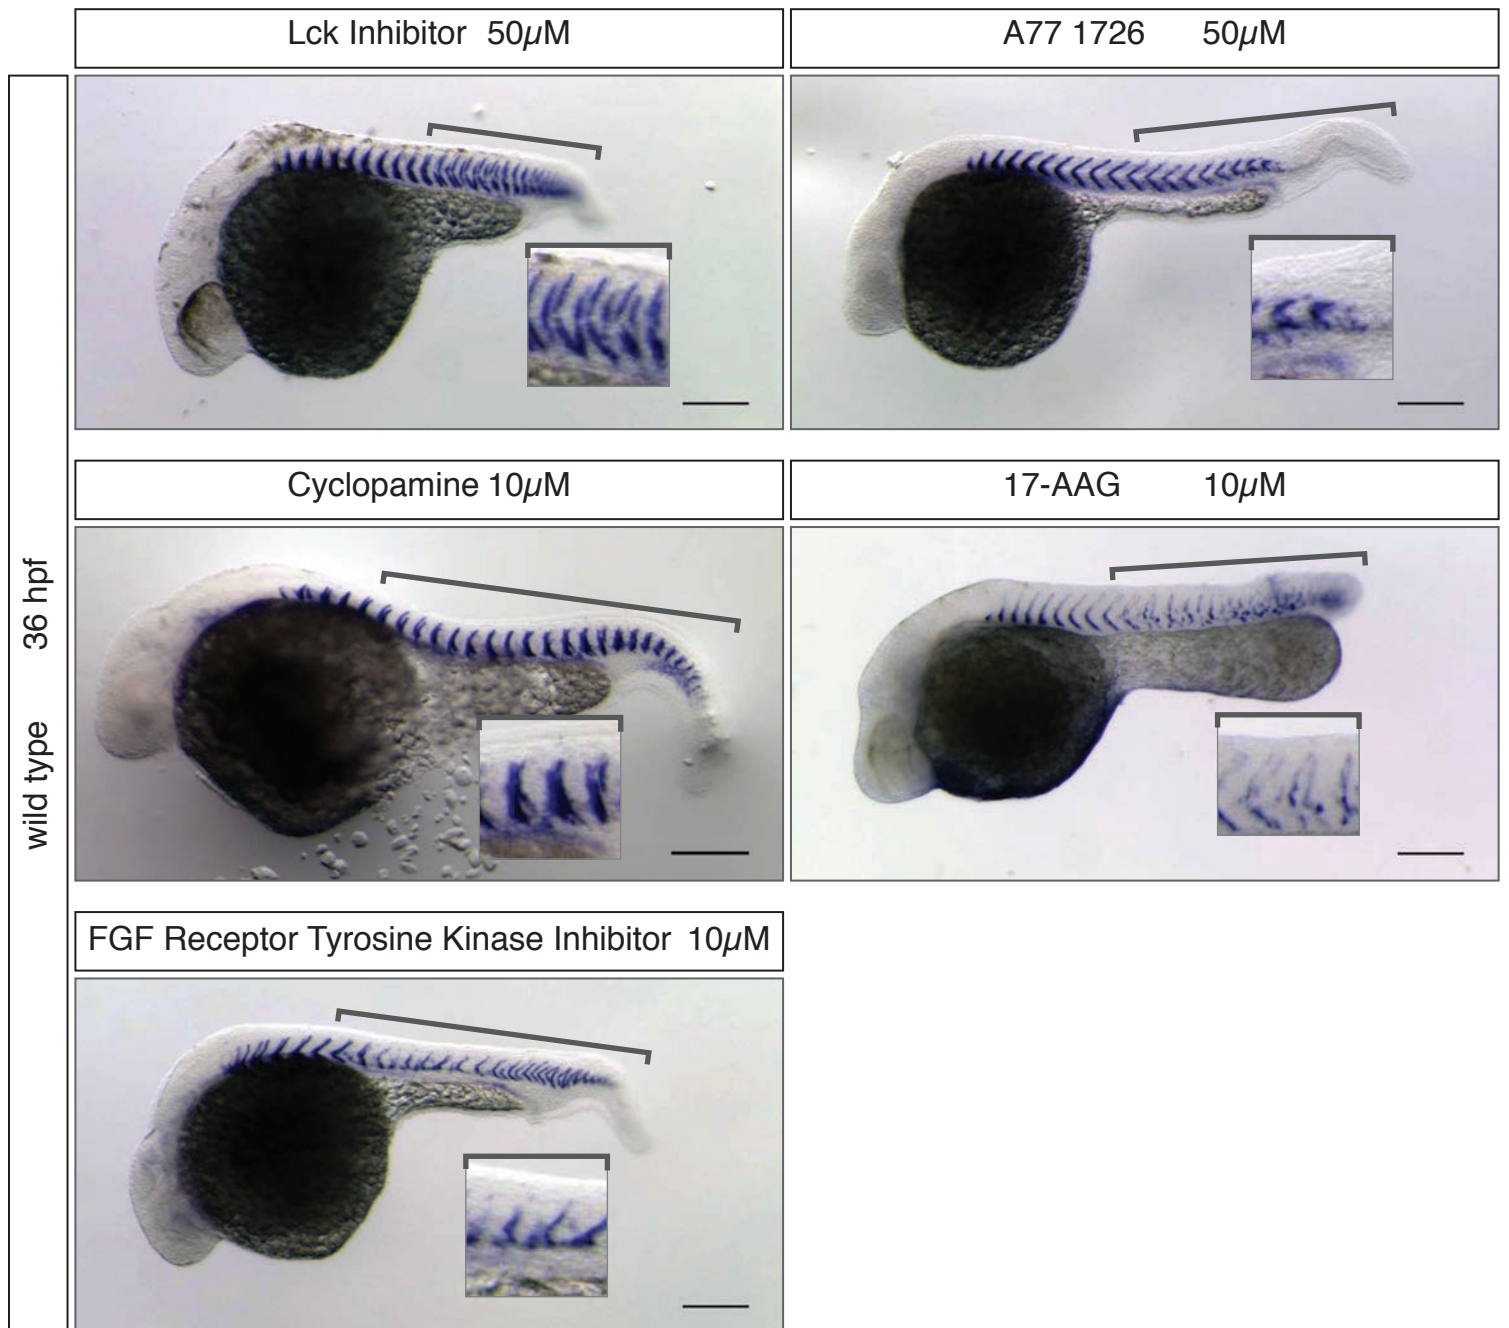

**Supplementary figure 4. Phenotypes with lower segmentation-specificity**

Identified hit phenotypes with direct segmentation defects according the classification used in Table 1, visible at 36 hpf after *xirp2a in situ* hybridization. All treatments are as labelled in the panel above the image. Anterior to the right, posterior to the left. Insets show zoom-in of the segment pattern and defects. Brackets indicate the area of the axis where segment boundary defects occurred.



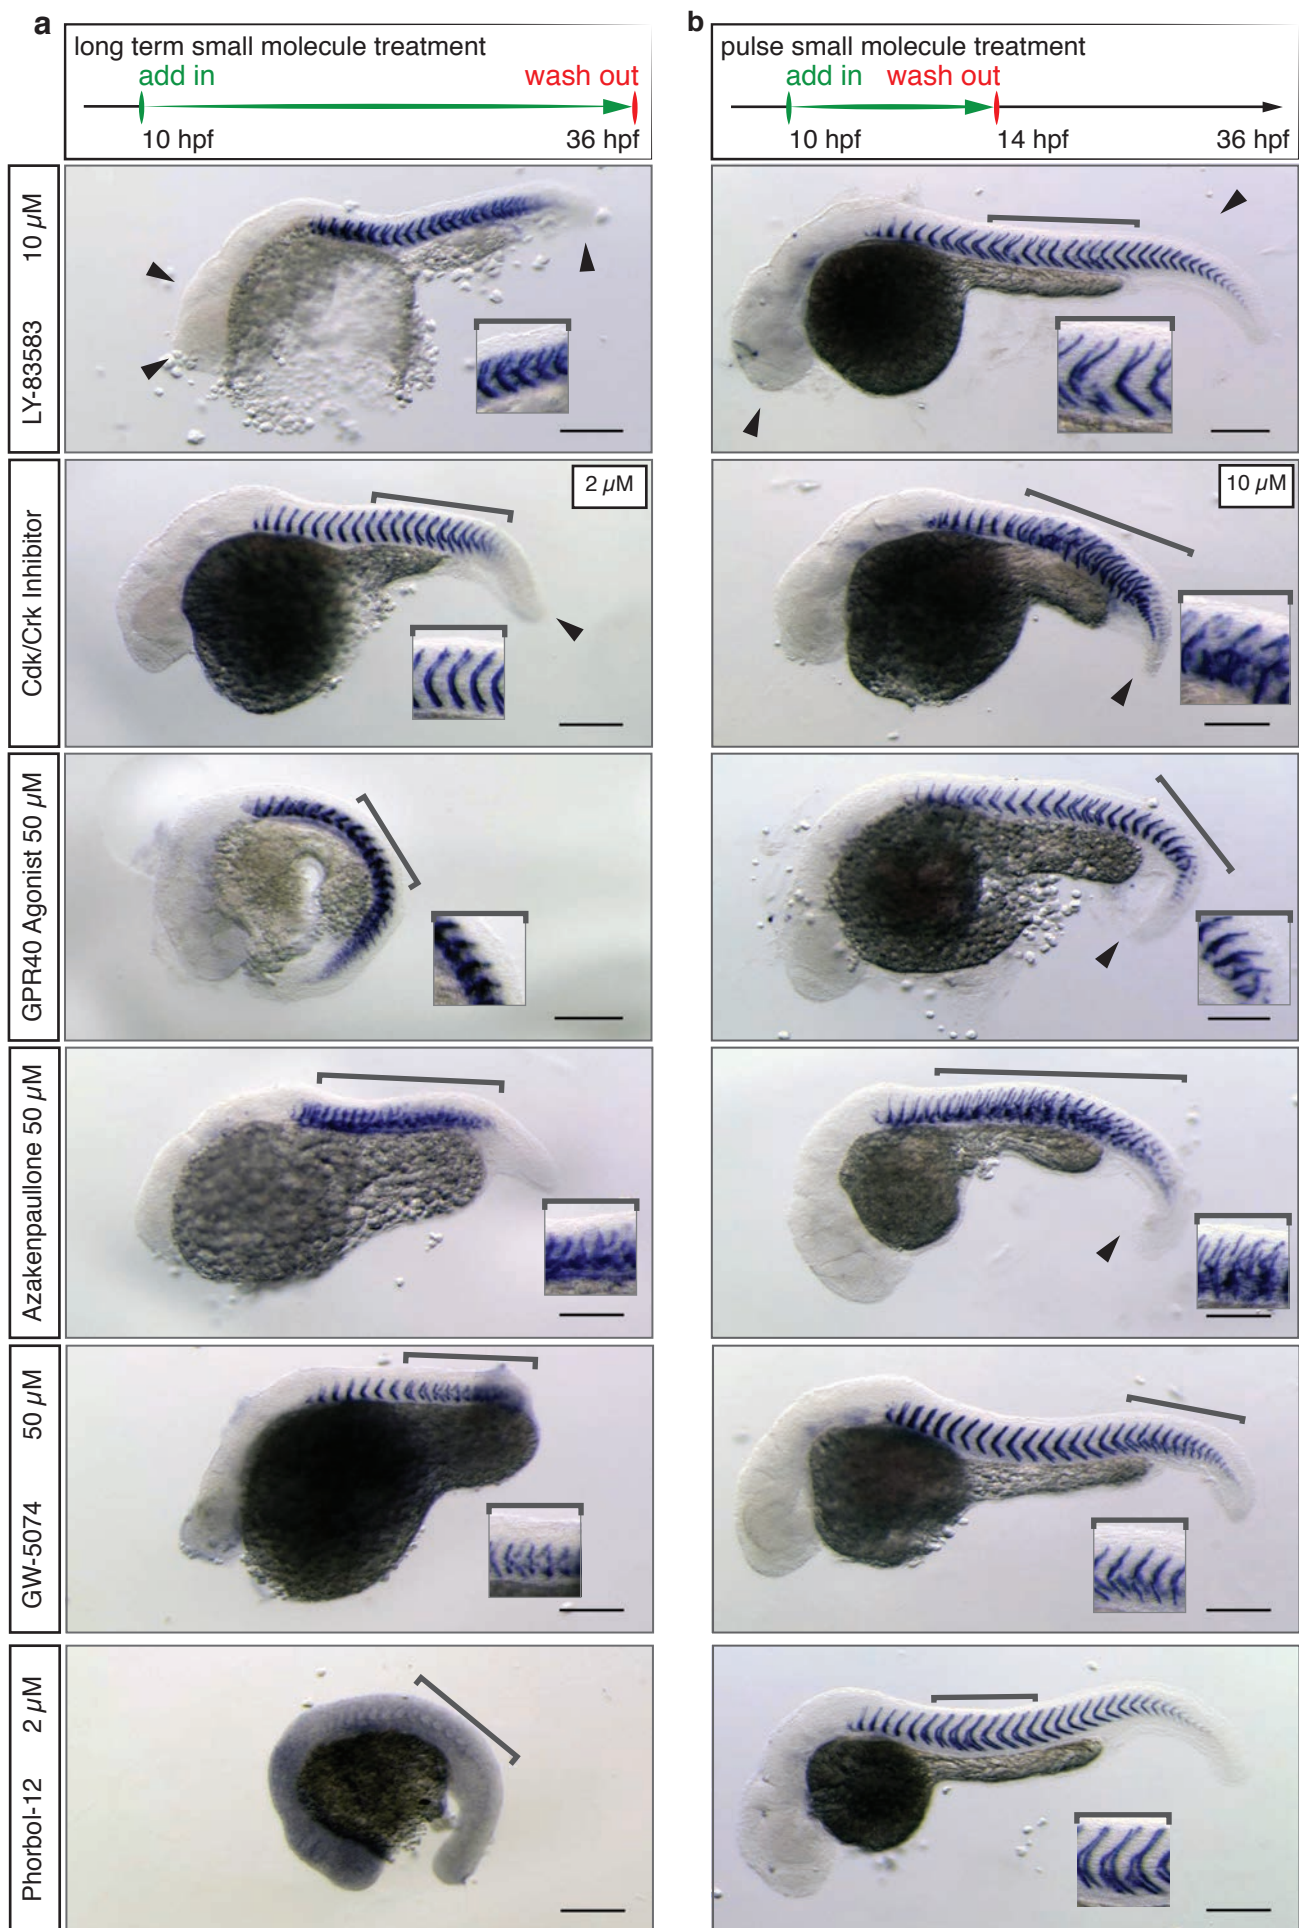

**Supplementary figure 5. Pulse treatments with higher segmentation-specificity**

Hits previously hidden in the general morphology cluster that were identified after 4h pulse treatment with subsequent wash-out. Small molecules and concentration used are labelled in the left panel. Anterior to the right, posterior to the left of each image. **(a)** Embryonic phenotypes as observed after long-term treatment during screen. **(b)** Embryonic phenotypes showing higher segmentation-specificity after shorter pulse treatment. In the case of the Cdk/Crk inhibitor, the 10  $\mu$ M long-term treatment was lethal, so the 2  $\mu$ M long-term treatment is shown instead. Insets show zoom-in of the segment pattern and defects. Brackets indicate the area of the axis where segment boundary defects occurred. Scale bar is 200  $\mu$ m.

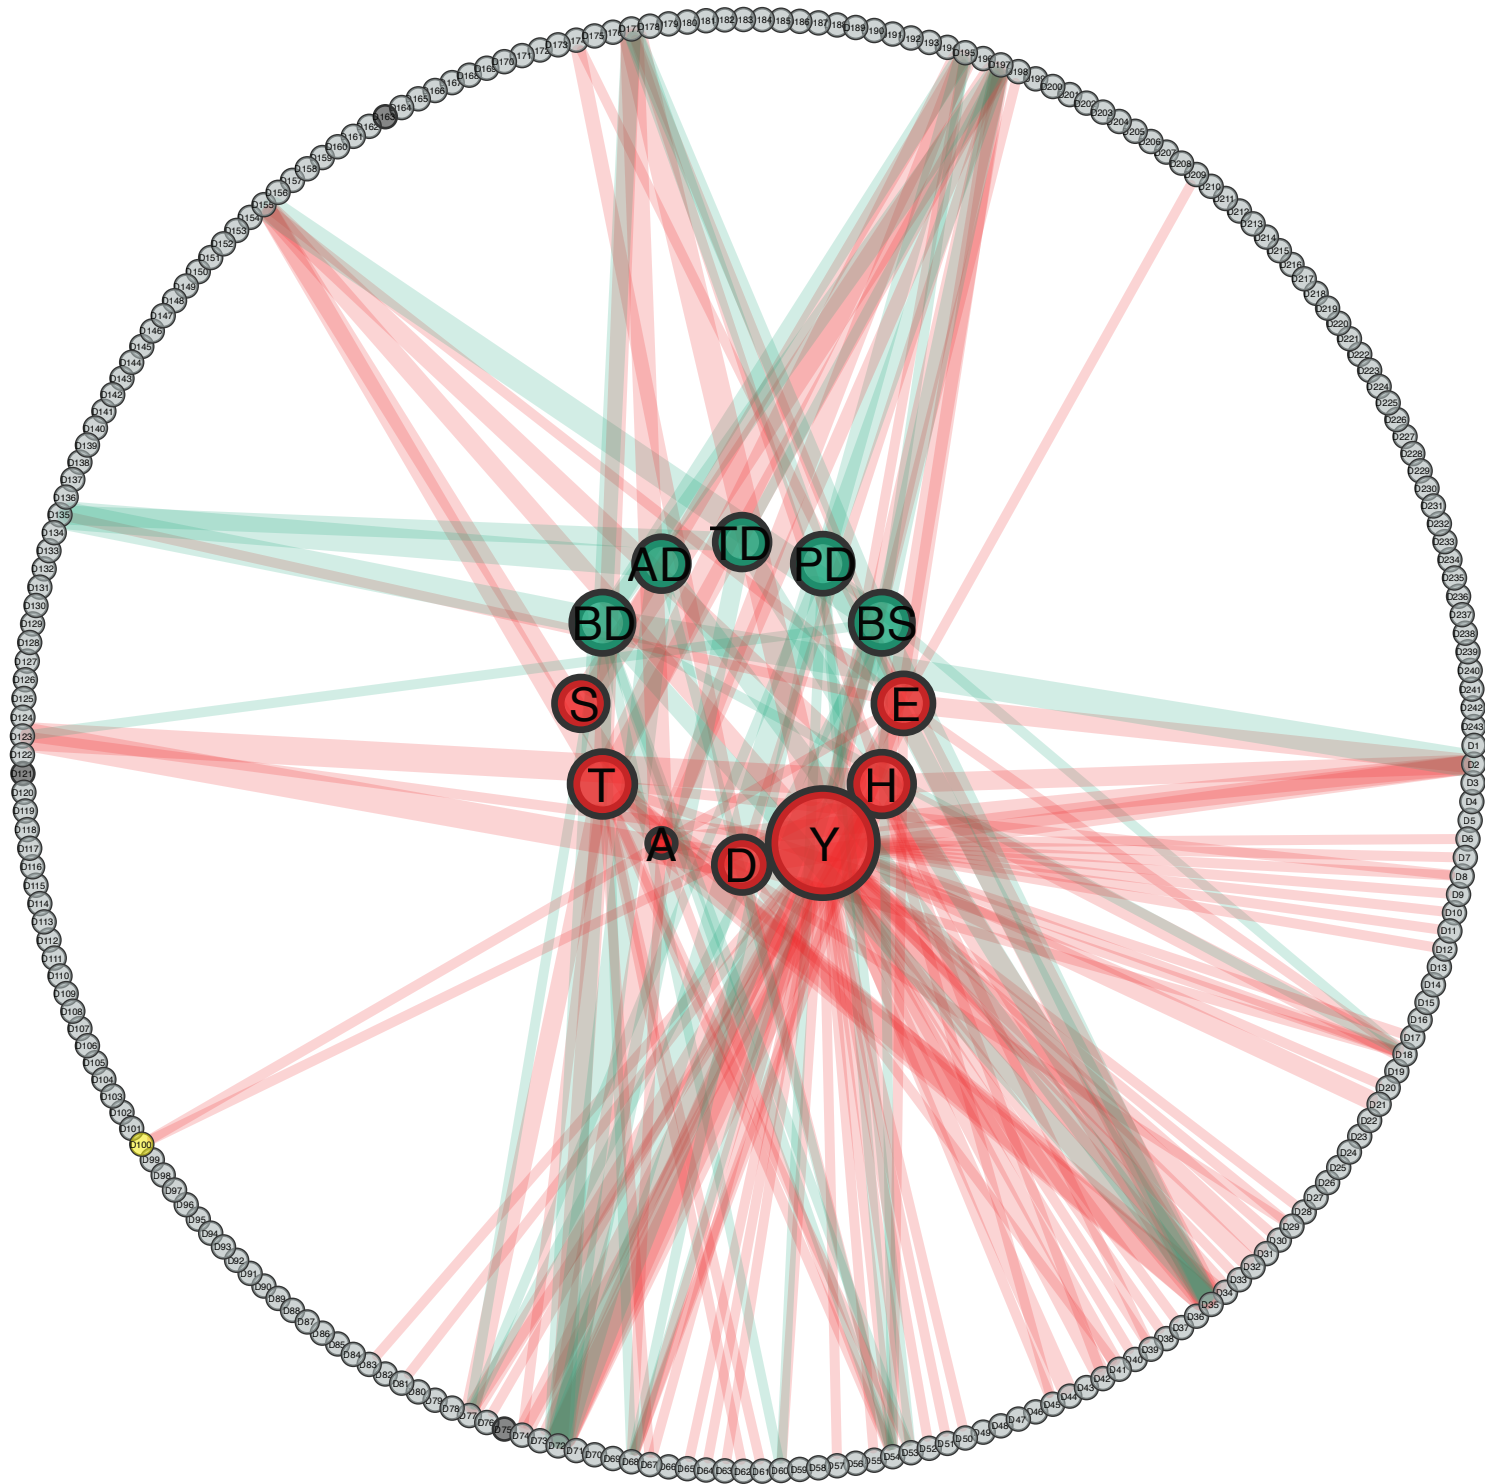

**Supplementary figure 6. Network visualisation of phenotypic parameters wild type A, 2  $\mu$ M**

Phenotypic scoring per small molecule concentration illustrated as interaction networks. Inner circles represent phenotypic parameters, with morphology in green and segmentation in red. The size of nodes represents the frequency of scoring >0 for the individual parameter. Interactions to the outer circle represent the scoring of a phenotypic parameter to the associated small molecule treatment (grey circles). A legend of corresponding small molecule names can be found in Supplementary Data 1. Thickness of the interaction lines reflects the magnitude of the score. Dark grey circles represent lethal conditions. The networks are presented with vector graphics, so the details of numbers and interactions can be seen by zooming in.



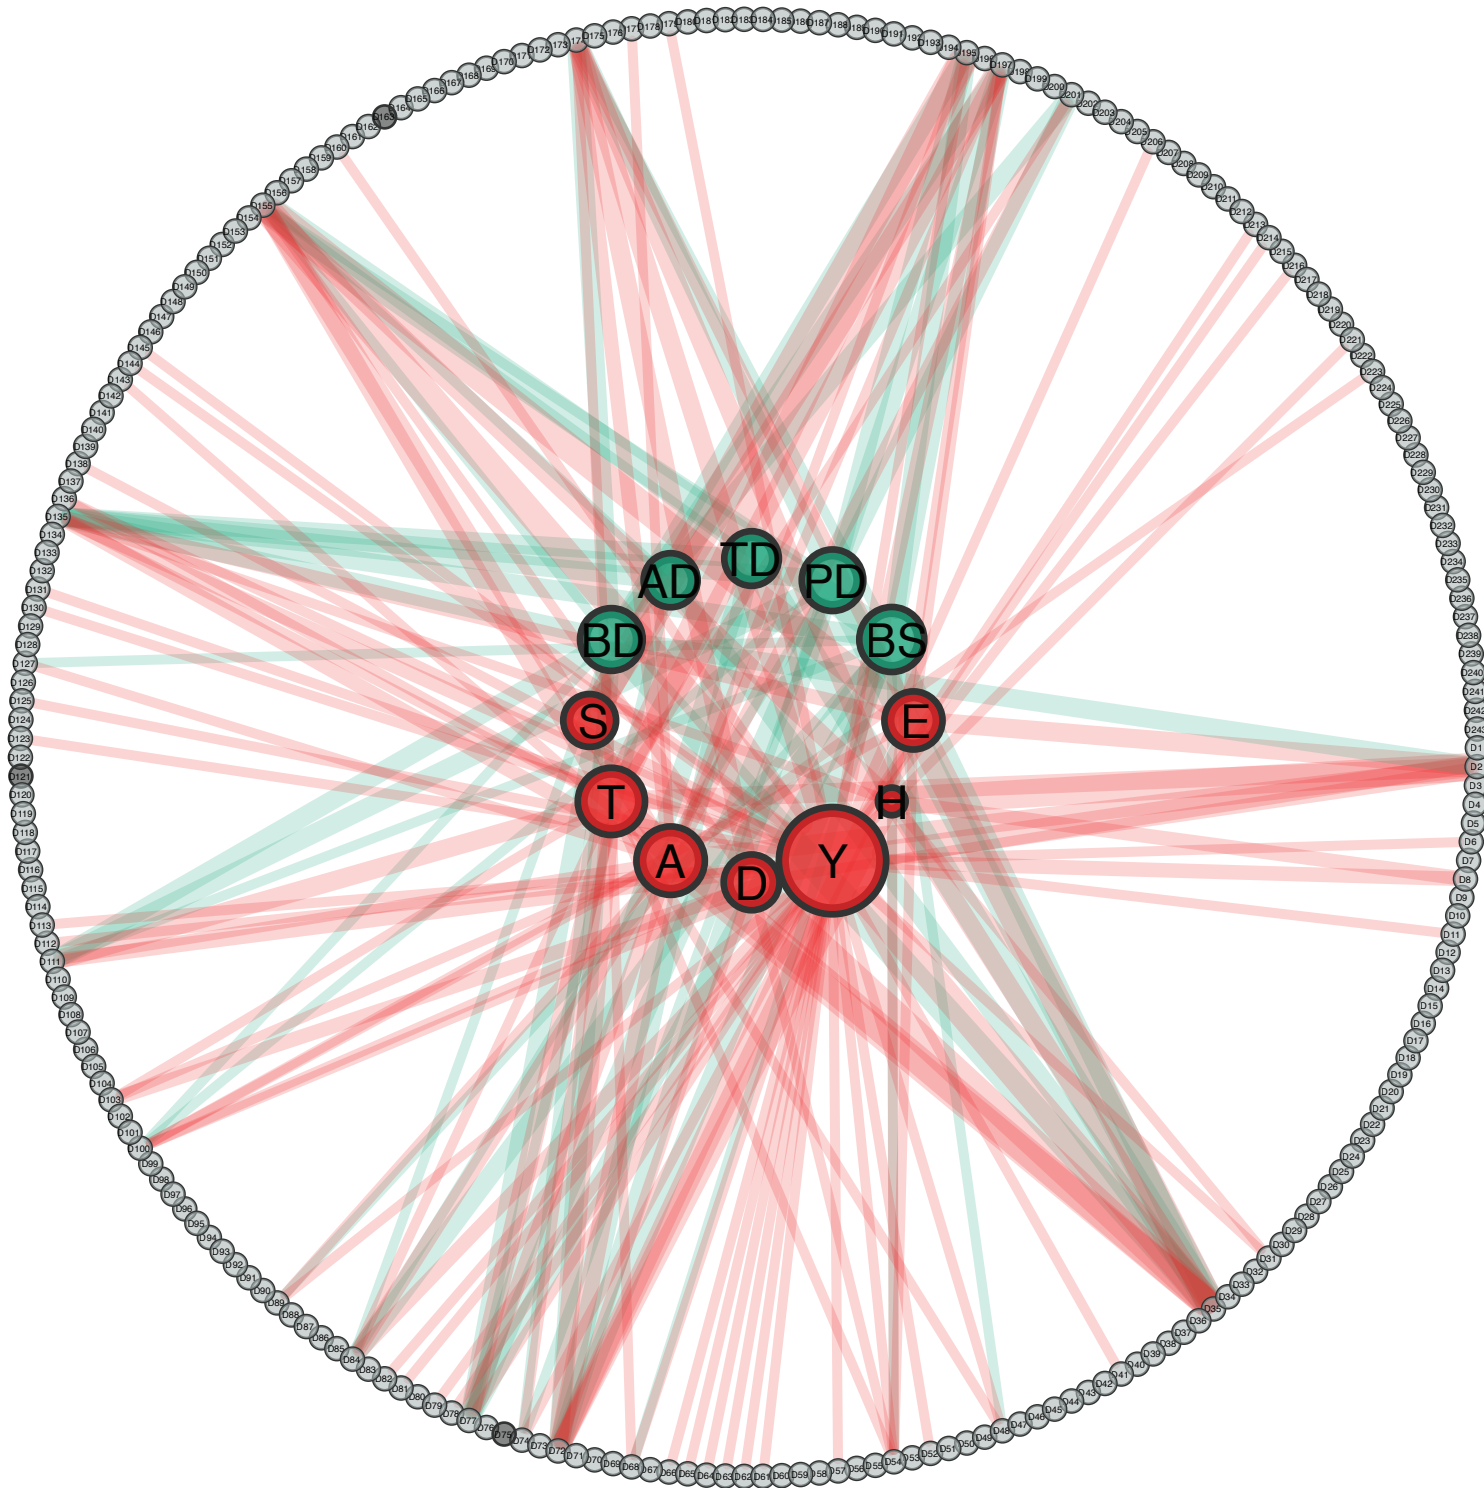

**Supplementary figure 7. Network visualisation of phenotypic parameters wild type B, 2  $\mu$ M**

Phenotypic scoring per small molecule concentration illustrated as interaction networks. Inner circles represent phenotypic parameters, with morphology in green and segmentation in red. The size of nodes represents the frequency of scoring >0 for the individual parameter. Interactions to the outer circle represent the scoring of a phenotypic parameter to the associated small molecule treatment (grey circles). A legend of corresponding small molecule names can be found in Supplementary Data 1. Thickness of the interaction lines reflects the magnitude of the score. Dark grey circles represent lethal conditions. The networks are presented with vector graphics, so the details of numbers and interactions can be seen by zooming in.



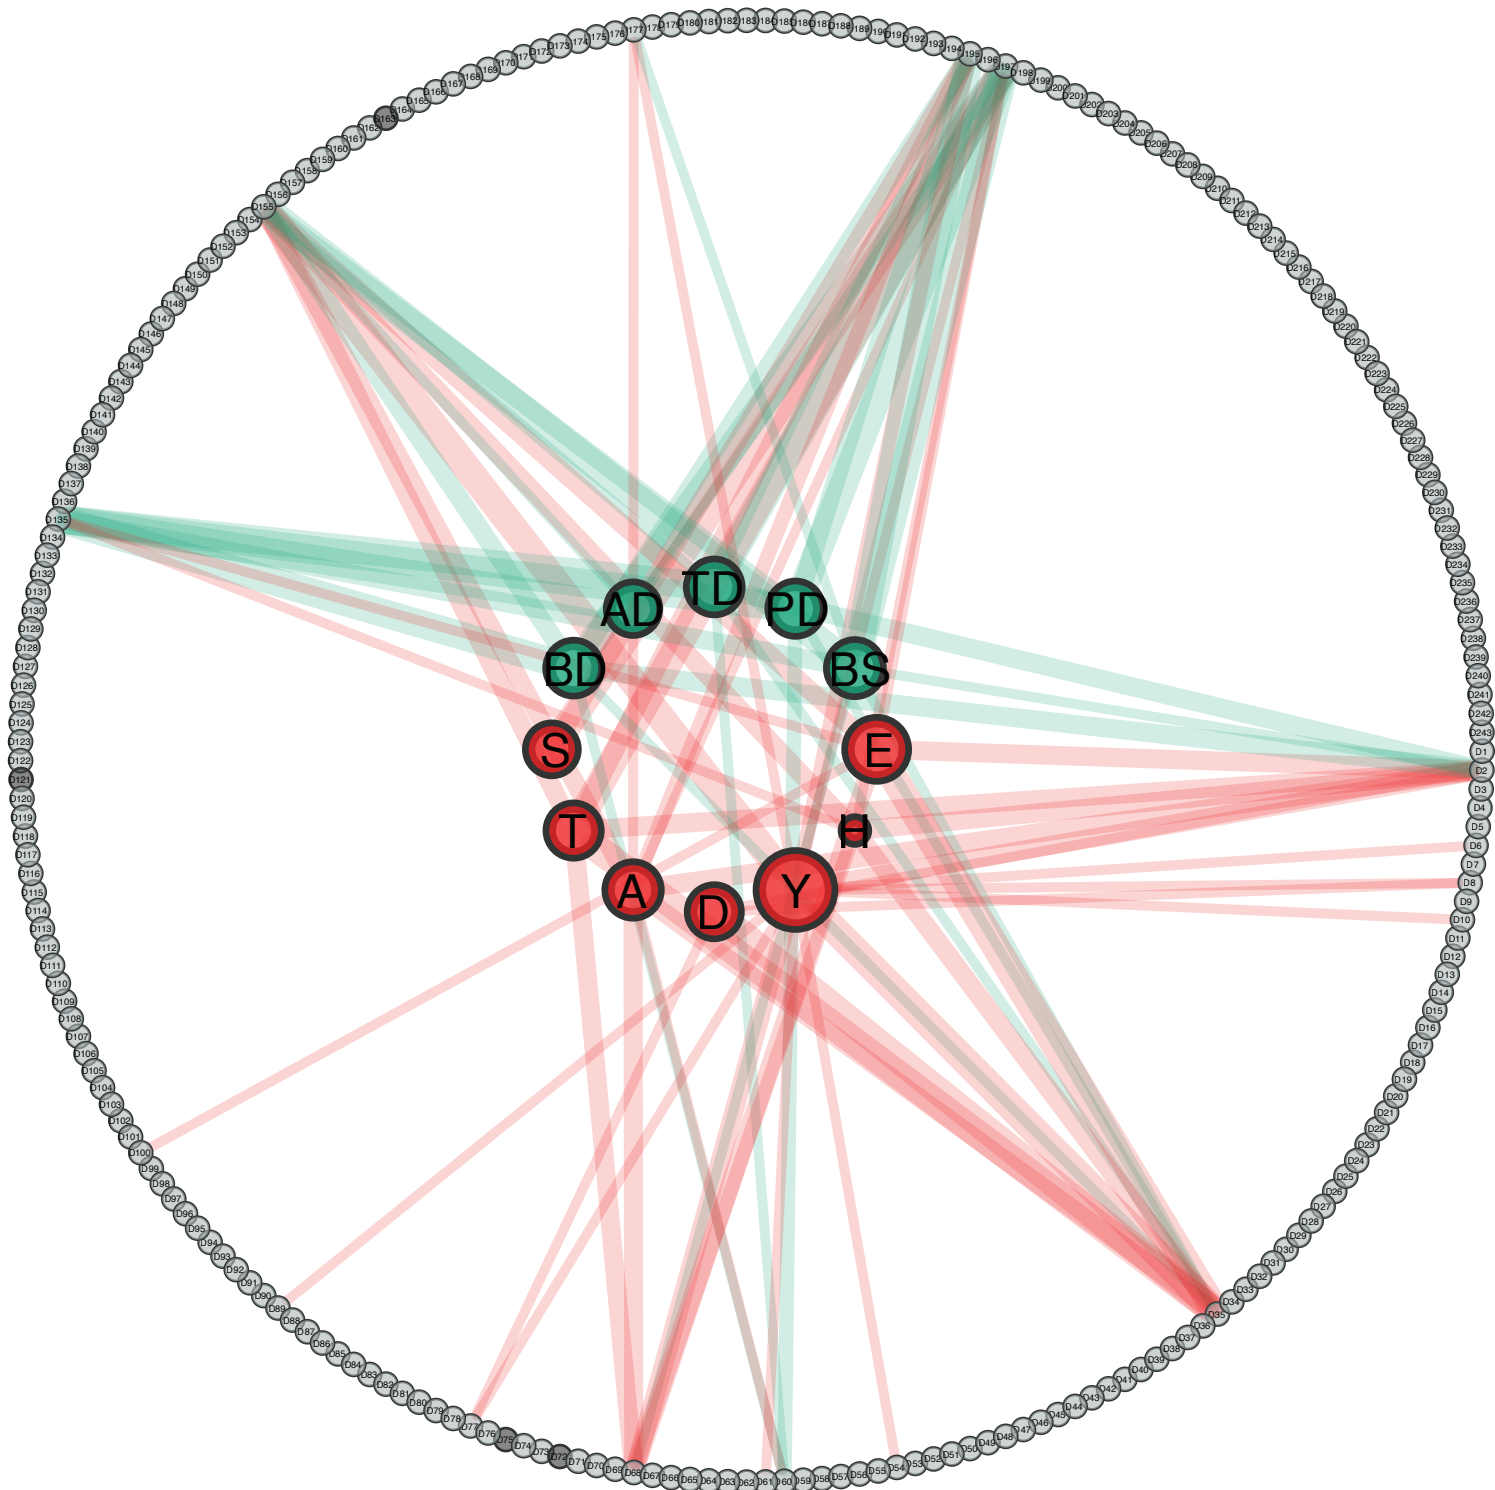

**Supplementary figure 8. Network visualisation of phenotypic parameters *her1* mutant, 2  $\mu$ M**

Phenotypic scoring per small molecule concentration illustrated as interaction networks. Inner circles represent phenotypic parameters, with morphology in green and segmentation in red. The size of nodes represents the frequency of scoring >0 for the individual parameter. Interactions to the outer circle represent the scoring of a phenotypic parameter to the associated small molecule treatment (grey circles). A legend of corresponding small molecule names can be found in Supplementary Data 1. Thickness of the interaction lines reflects the magnitude of the score. Dark grey circles represent lethal conditions. The networks are presented with vector graphics, so the details of numbers and interactions can be seen by zooming in.

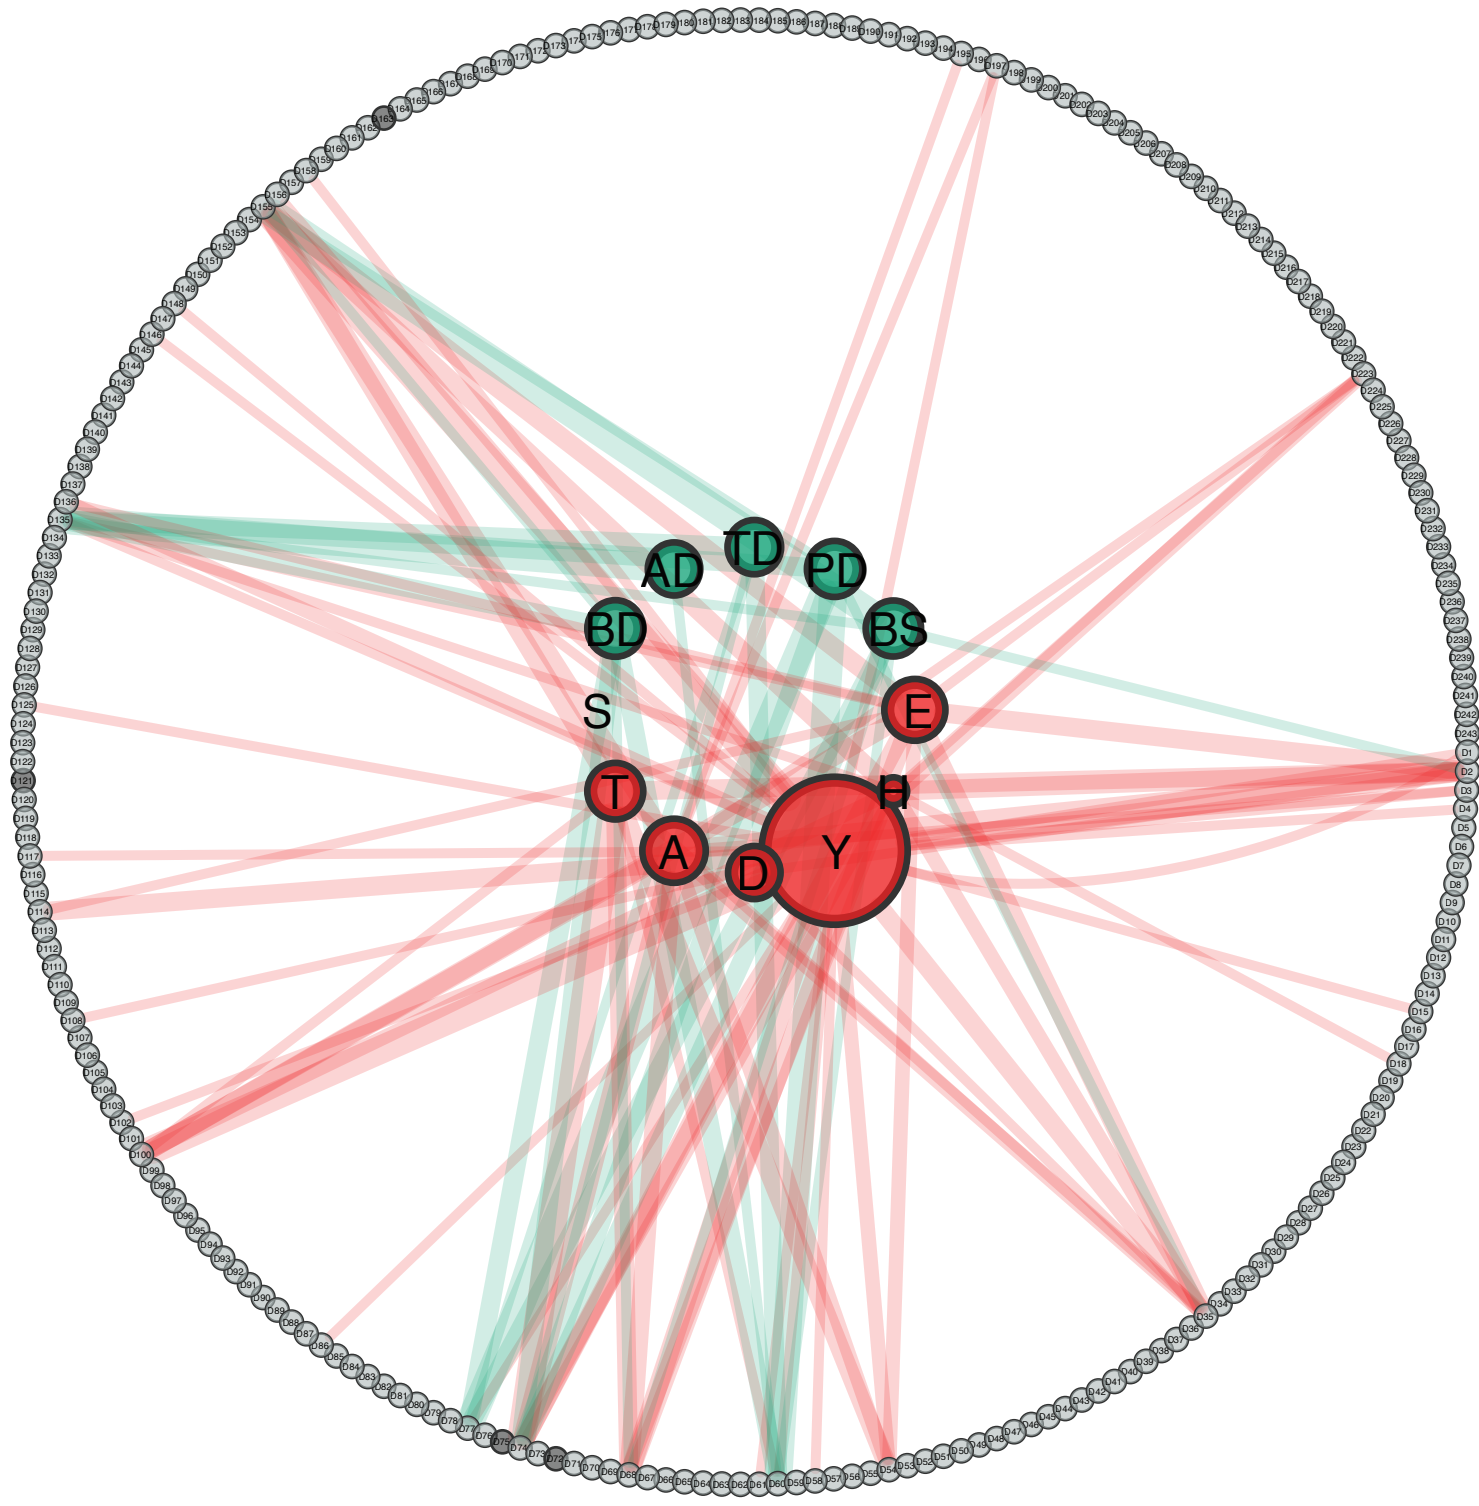

**Supplementary figure 9. Network visualisation of phenotypic parameters *hes6* mutant, 2µM**

Phenotypic scoring per small molecule concentration illustrated as interaction networks. Inner circles represent phenotypic parameters, with morphology in green and segmentation in red. The size of nodes represents the frequency of scoring >0 for the individual parameter. Interactions to the outer circle represent the scoring of a phenotypic parameter to the associated small molecule treatment (grey circles). A legend of corresponding small molecule names can be found in Supplementary Data 1. Thickness of the interaction lines reflects the magnitude of the score. Dark grey circles represent lethal conditions. The networks are presented with vector graphics, so the details of numbers and interactions can be seen by zooming in.

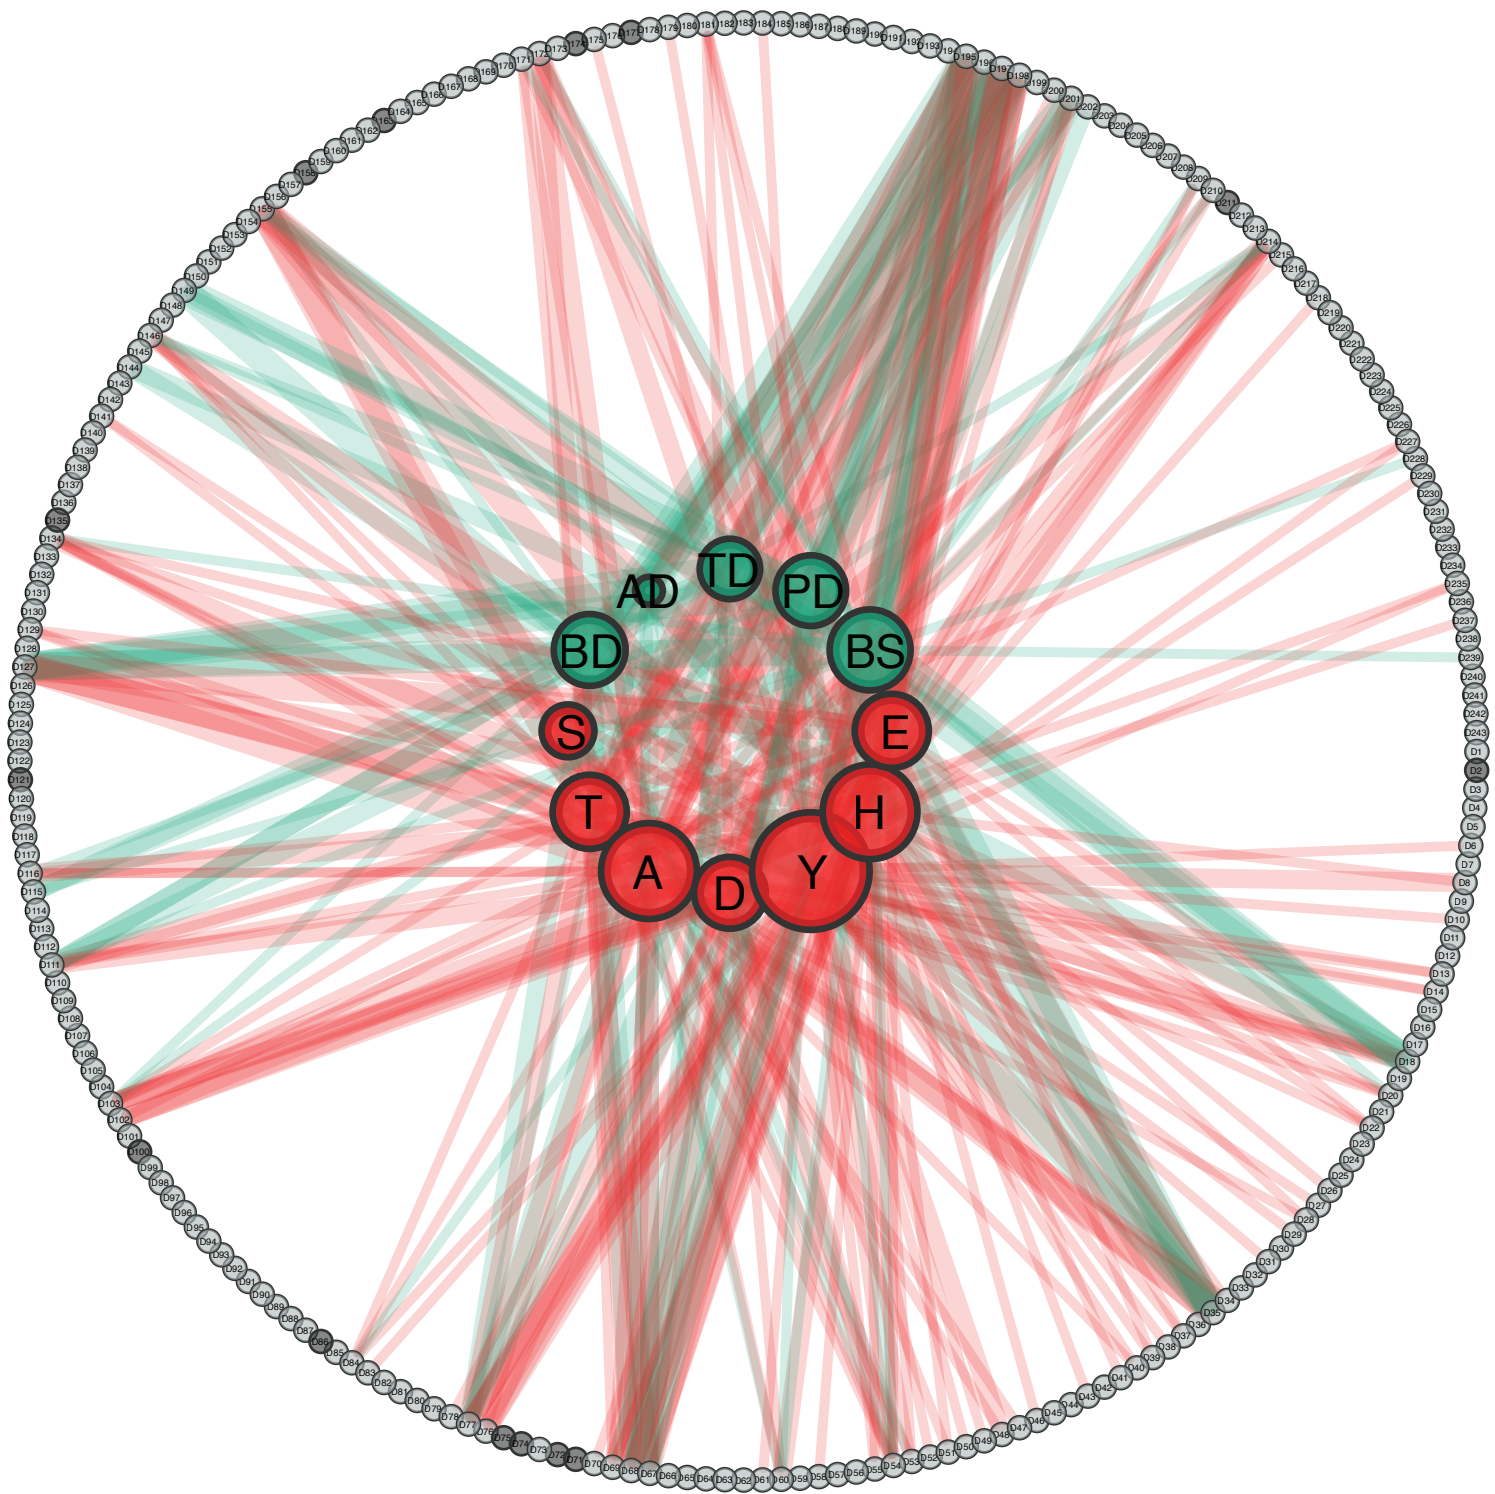

**Supplementary figure 10. Network visualisation of phenotypic parameters wild type A, 10  $\mu$ M**

Phenotypic scoring per small molecule concentration illustrated as interaction networks. Inner circles represent phenotypic parameters, with morphology in green and segmentation in red. The size of nodes represents the frequency of scoring >0 for the individual parameter. Interactions to the outer circle represent the scoring of a phenotypic parameter to the associated small molecule treatment (grey circles). A legend of corresponding small molecule names can be found in Supplementary Data 1. Thickness of the interaction lines reflects the magnitude of the score. Dark grey circles represent lethal conditions. The networks are presented with vector graphics, so the details of numbers and interactions can be seen by zooming in.



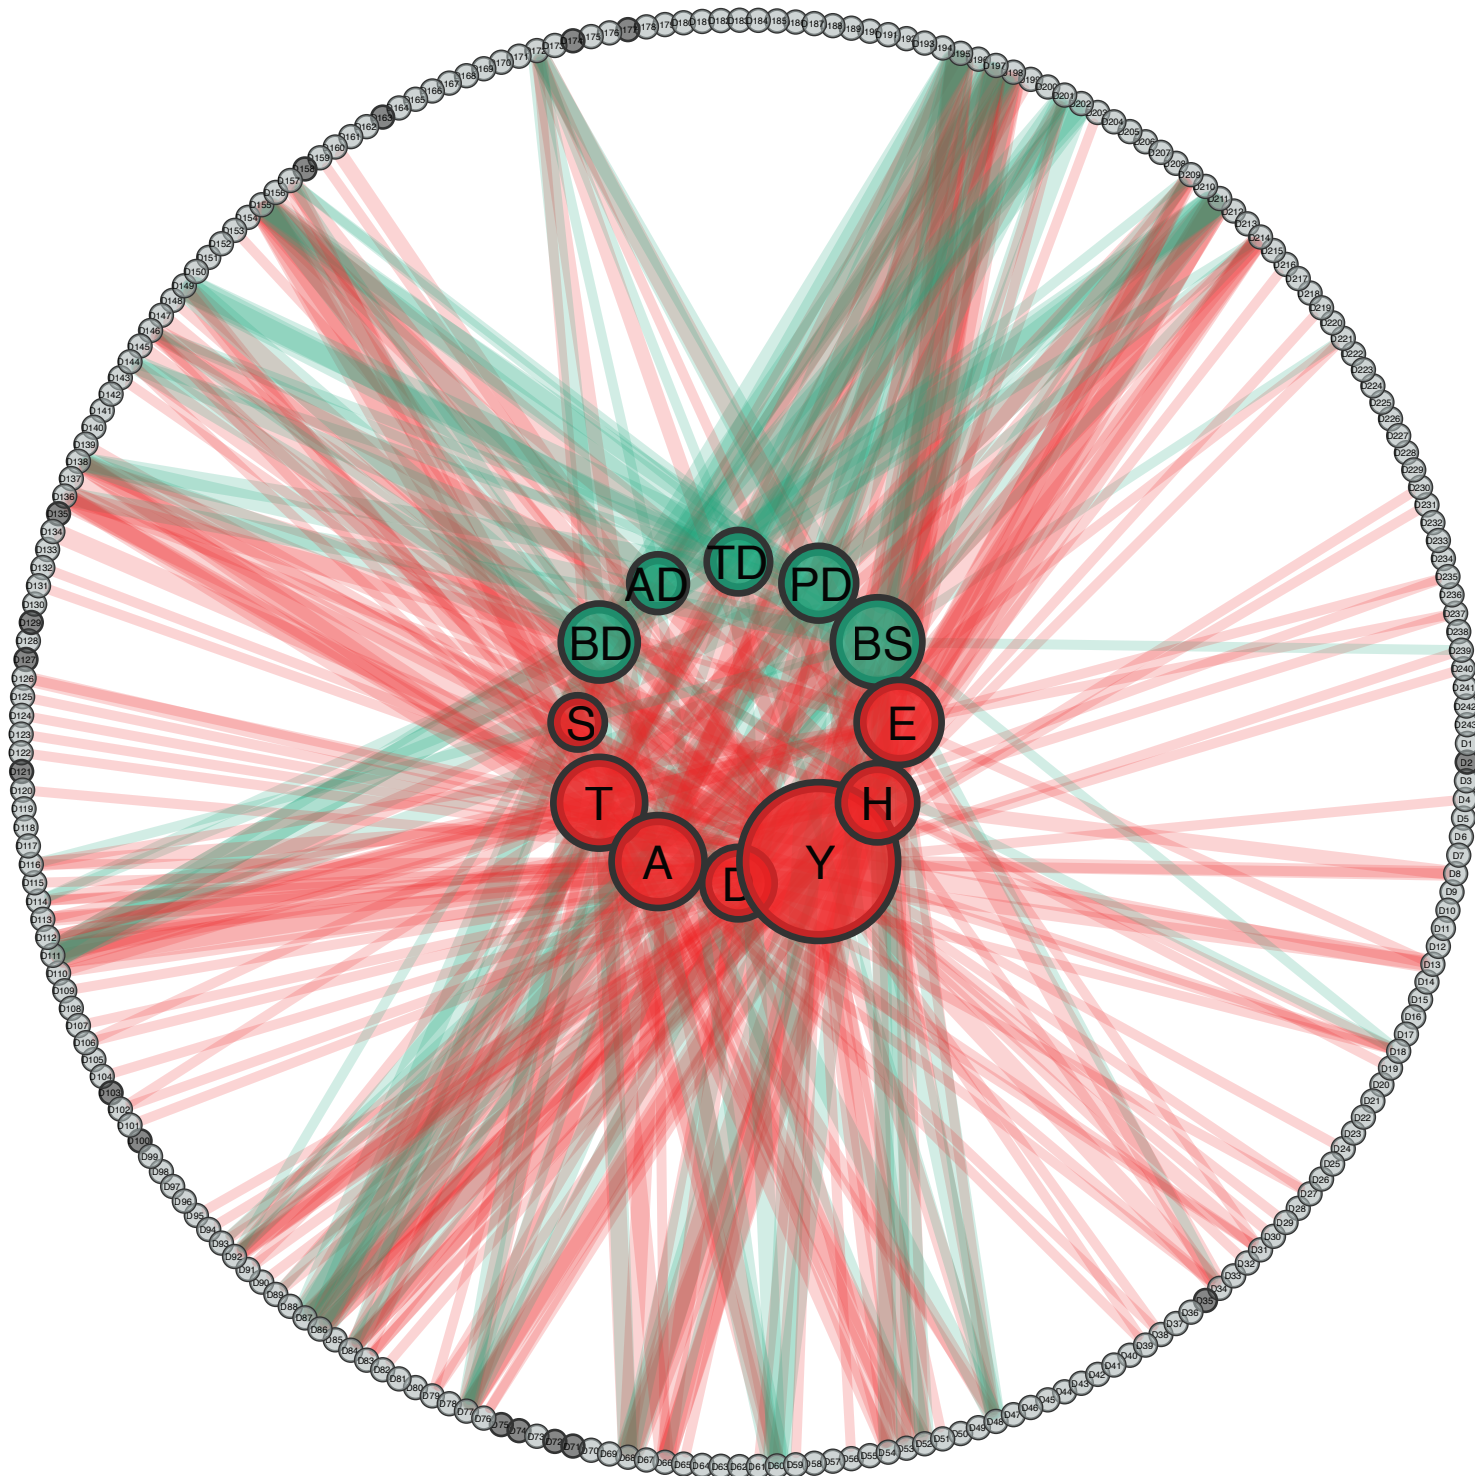

**Supplementary figure 11. Network visualisation of phenotypic parameters wild type B, 10  $\mu$ M**

Phenotypic scoring per small molecule concentration illustrated as interaction networks. Inner circles represent phenotypic parameters, with morphology in green and segmentation in red. The size of nodes represents the frequency of scoring >0 for the individual parameter. Interactions to the outer circle represent the scoring of a phenotypic parameter to the associated small molecule treatment (grey circles). A legend of corresponding small molecule names can be found in Supplementary Data 1. Thickness of the interaction lines reflects the magnitude of the score. Dark grey circles represent lethal conditions. The networks are presented with vector graphics, so the details of numbers and interactions can be seen by zooming in.

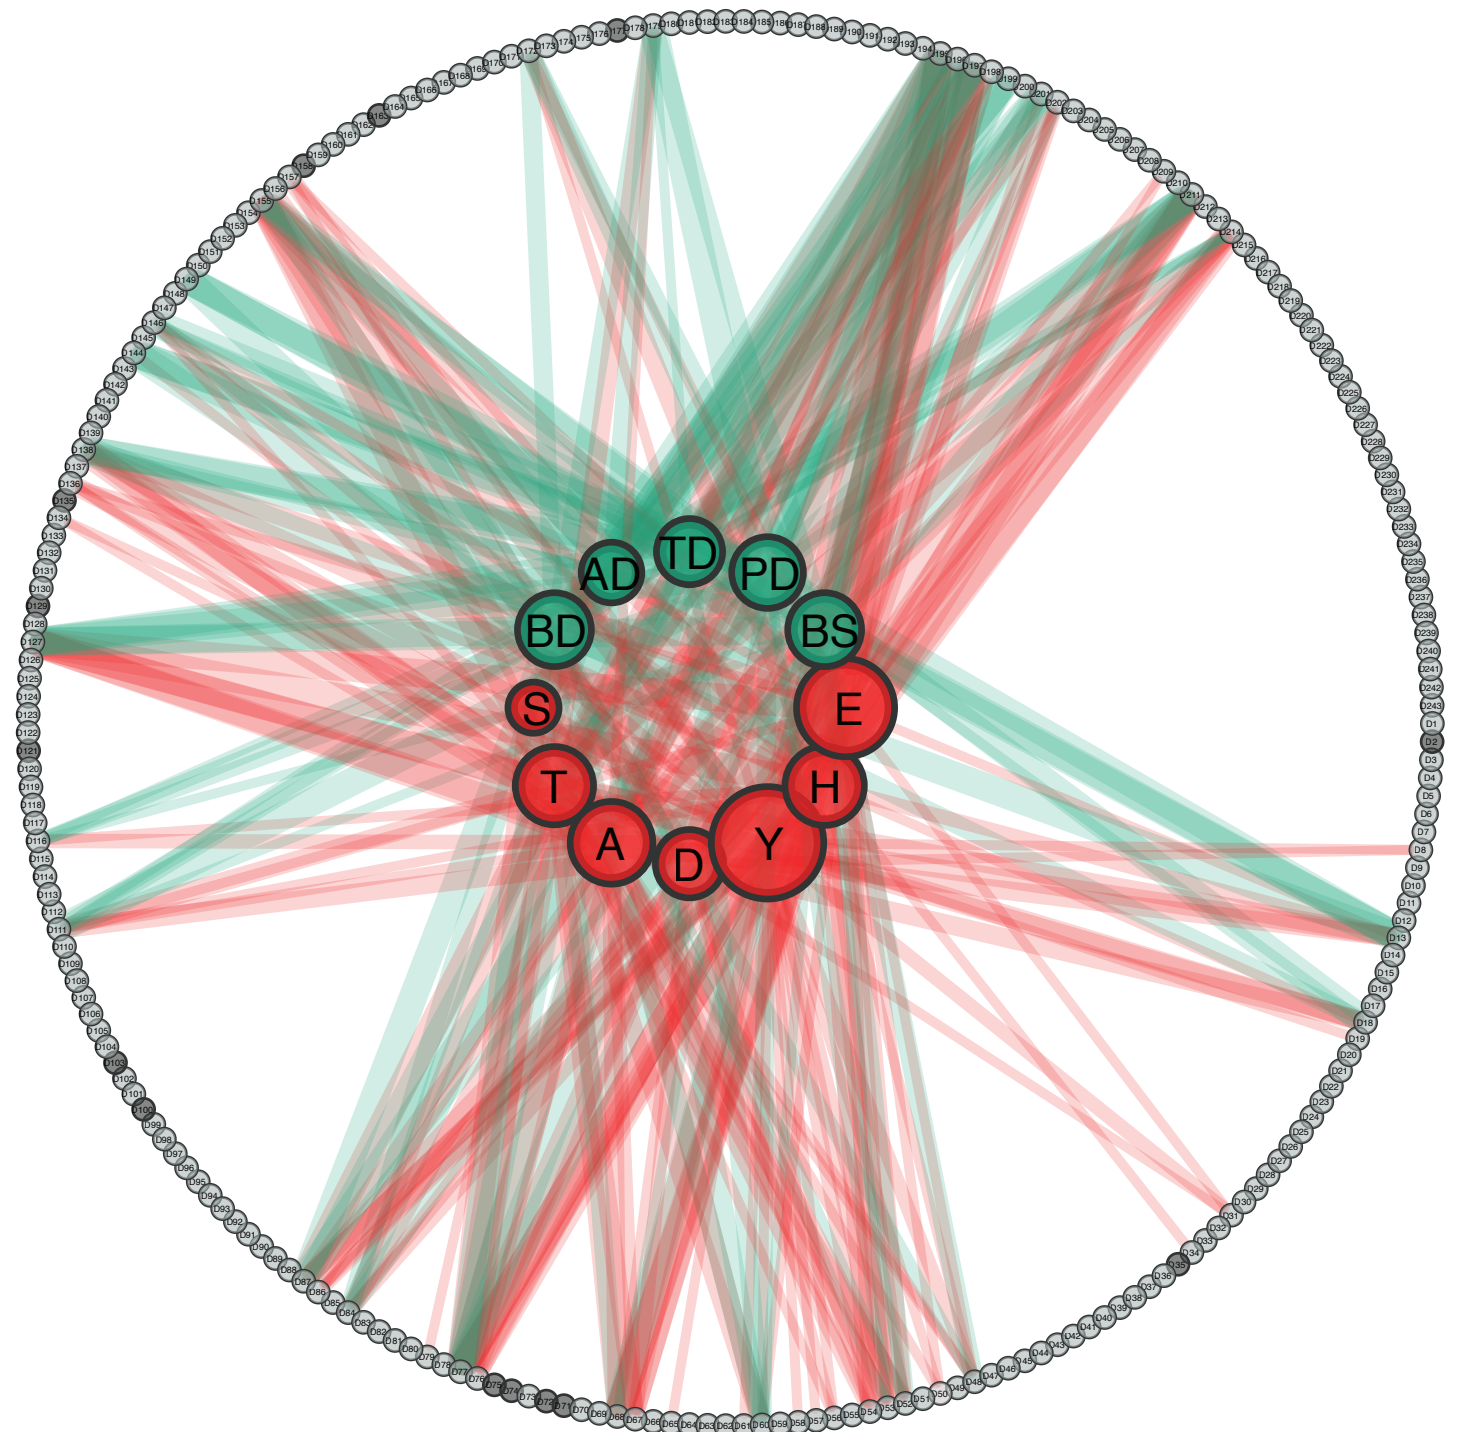

**Supplementary figure 12. Network visualisation of phenotypic parameters *her1* mutant, 10  $\mu$ M**

Phenotypic scoring per small molecule concentration illustrated as interaction networks. Inner circles represent phenotypic parameters, with morphology in green and segmentation in red. The size of nodes represents the frequency of scoring >0 for the individual parameter. Interactions to the outer circle represent the scoring of a phenotypic parameter to the associated small molecule treatment (grey circles). A legend of corresponding small molecule names can be found in Supplementary Data 1. Thickness of the interaction lines reflects the magnitude of the score. Dark grey circles represent lethal conditions. The networks are presented with vector graphics, so the details of numbers and interactions can be seen by zooming in.



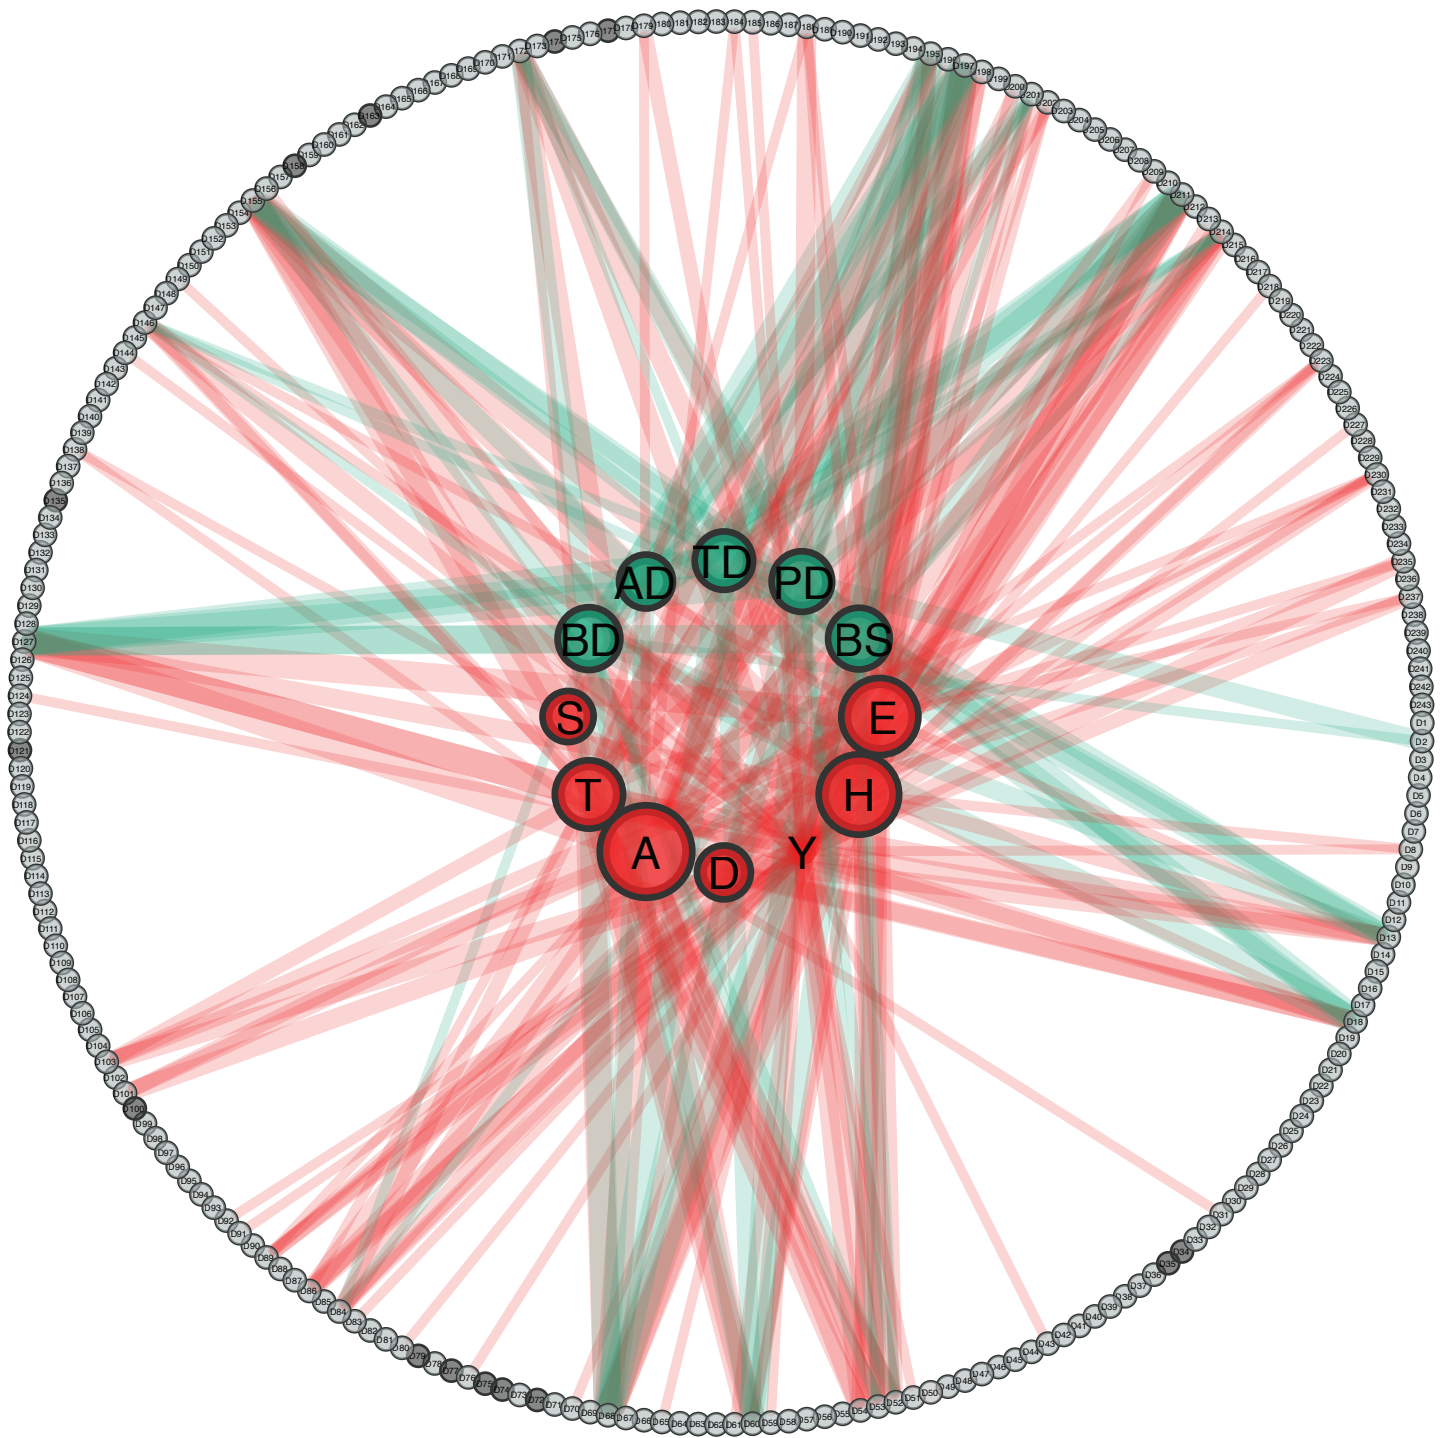

**Supplementary figure 13. Network visualisation of phenotypic parameters *hes6* mutant, 10 $\mu$ M**

Phenotypic scoring per small molecule concentration illustrated as interaction networks. Inner circles represent phenotypic parameters, with morphology in green and segmentation in red. The size of nodes represents the frequency of scoring >0 for the individual parameter. Interactions to the outer circle represent the scoring of a phenotypic parameter to the associated small molecule treatment (grey circles). A legend of corresponding small molecule names can be found in Supplementary Data 1. Thickness of the interaction lines reflects the magnitude of the score. Dark grey circles represent lethal conditions. The networks are presented with vector graphics, so the details of numbers and interactions can be seen by zooming in.



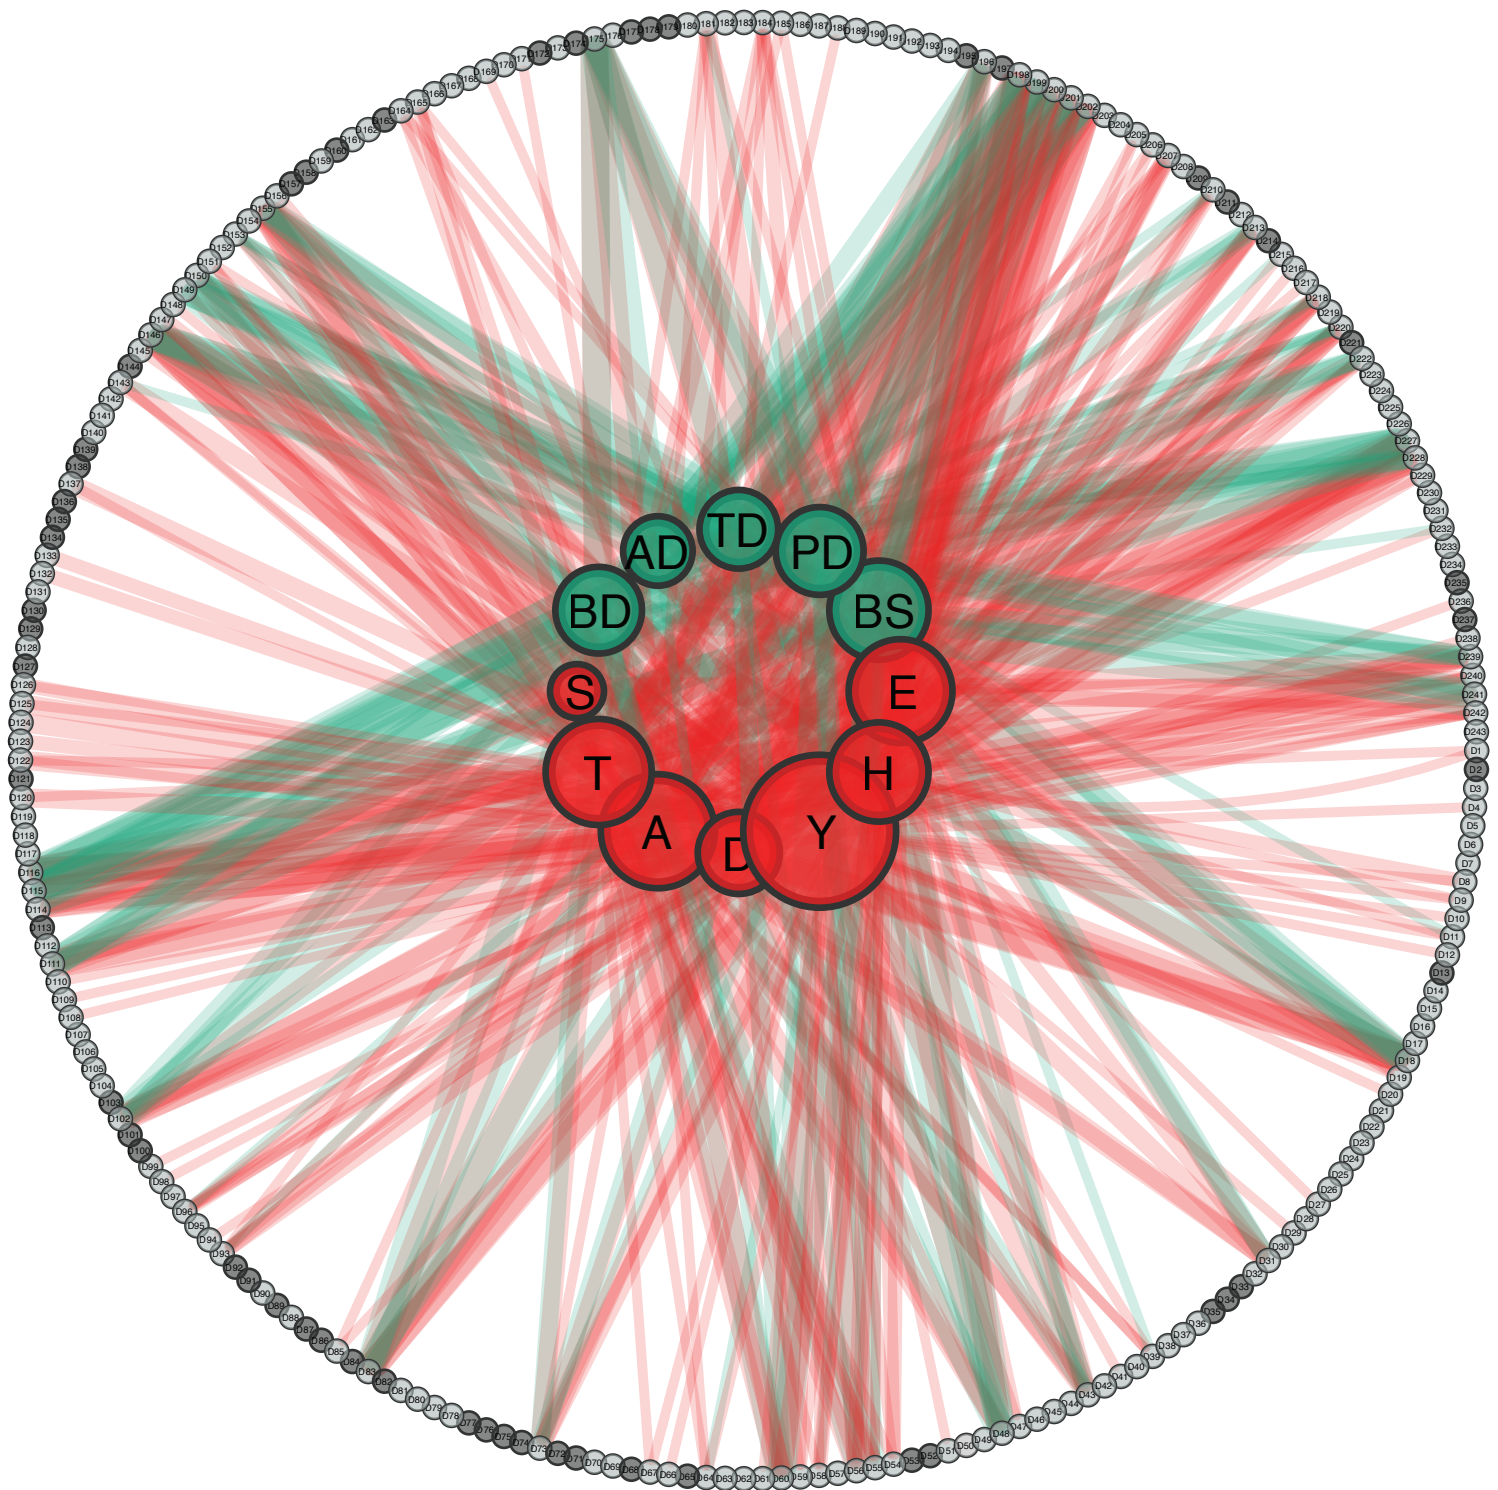

**Supplementary figure 14. Network visualisation of phenotypic parameters wild type A, 50  $\mu$ M**

Phenotypic scoring per small molecule concentration illustrated as interaction networks. Inner circles represent phenotypic parameters, with morphology in green and segmentation in red. The size of nodes represents the frequency of scoring >0 for the individual parameter. Interactions to the outer circle represent the scoring of a phenotypic parameter to the associated small molecule treatment (grey circles). A legend of corresponding small molecule names can be found in Supplementary Data 1. Thickness of the interaction lines reflects the magnitude of the score. Dark grey circles represent lethal conditions. The networks are presented with vector graphics, so the details of numbers and interactions can be seen by zooming in.

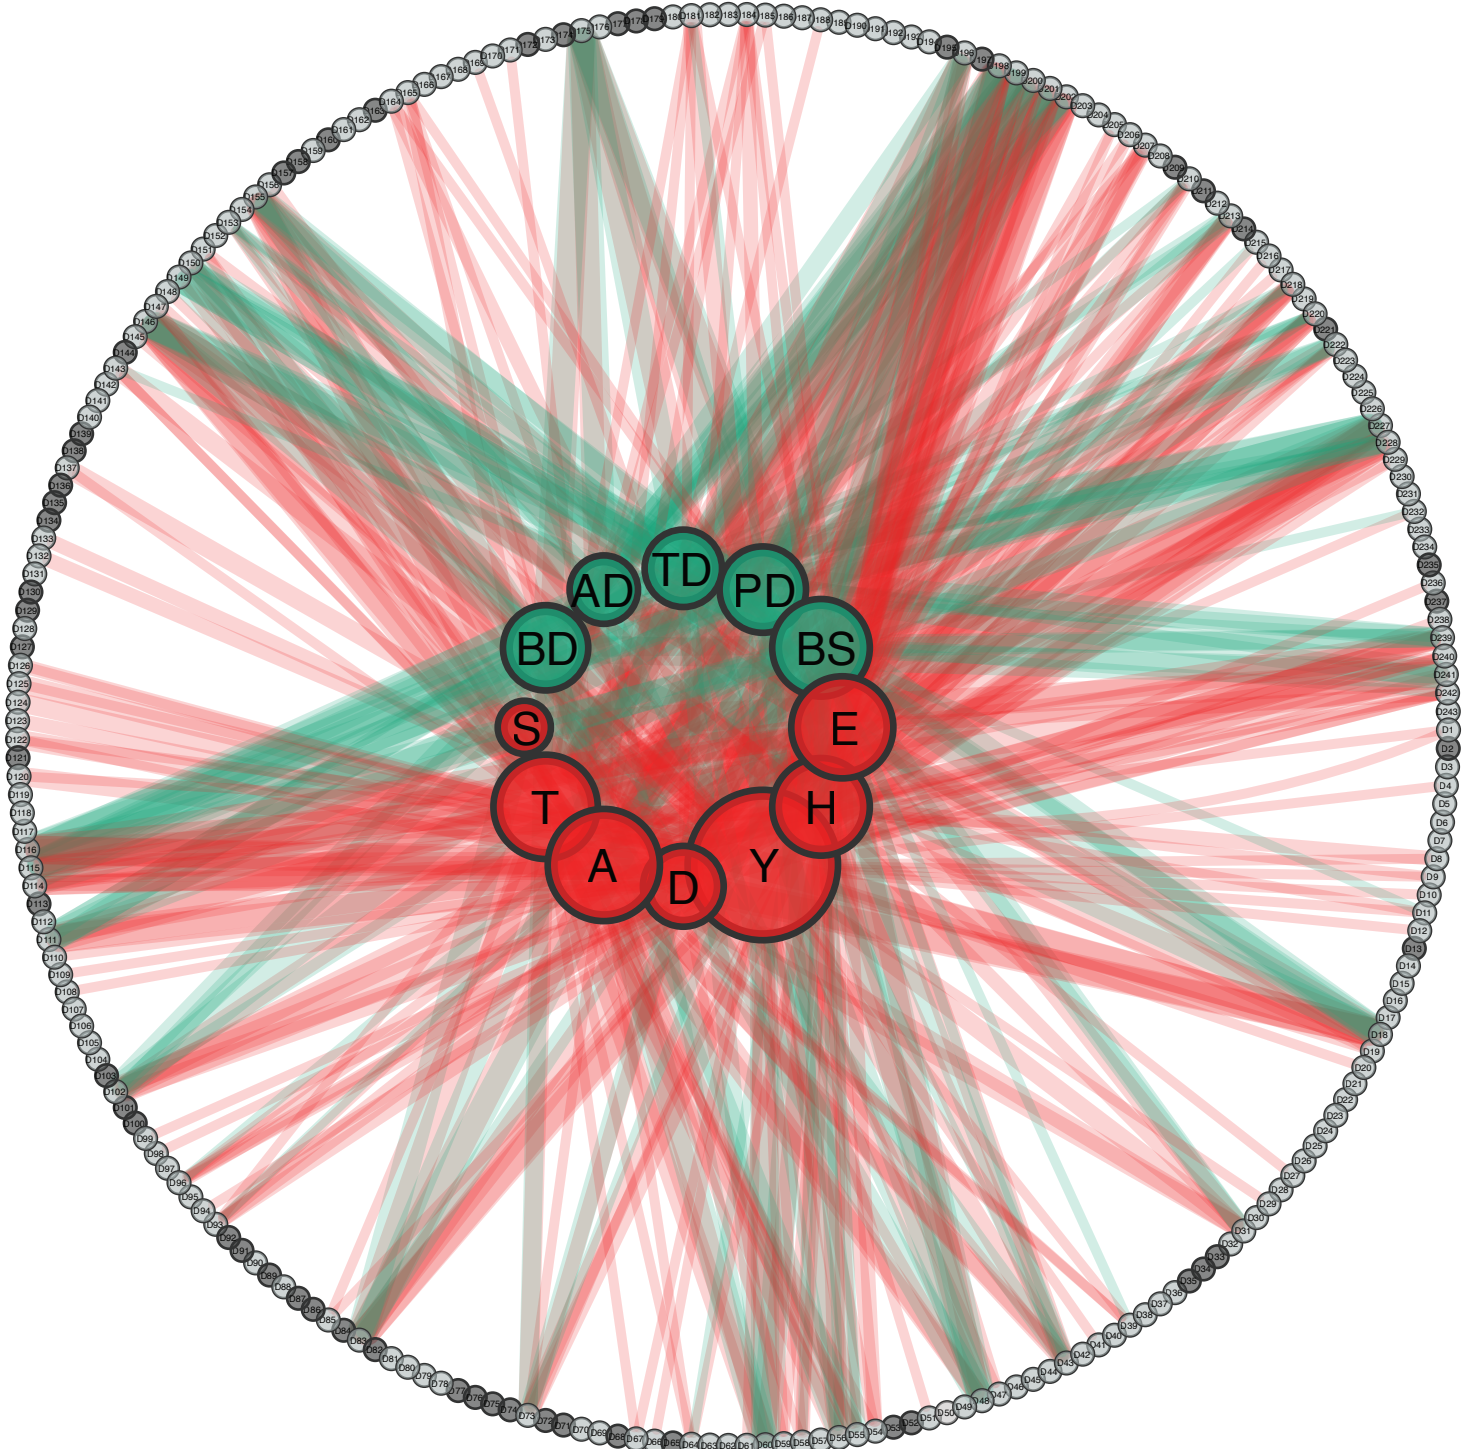

**Supplementary figure 15. Network visualisation of phenotypic parameters wild type B, 50  $\mu$ M**

Phenotypic scoring per small molecule concentration illustrated as interaction networks. Inner circles represent phenotypic parameters, with morphology in green and segmentation in red. The size of nodes represents the frequency of scoring >0 for the individual parameter. Interactions to the outer circle represent the scoring of a phenotypic parameter to the associated small molecule treatment (grey circles). A legend of corresponding small molecule names can be found in Supplementary Data 1. Thickness of the interaction lines reflects the magnitude of the score. Dark grey circles represent lethal conditions. The networks are presented with vector graphics, so the details of numbers and interactions can be seen by zooming in.



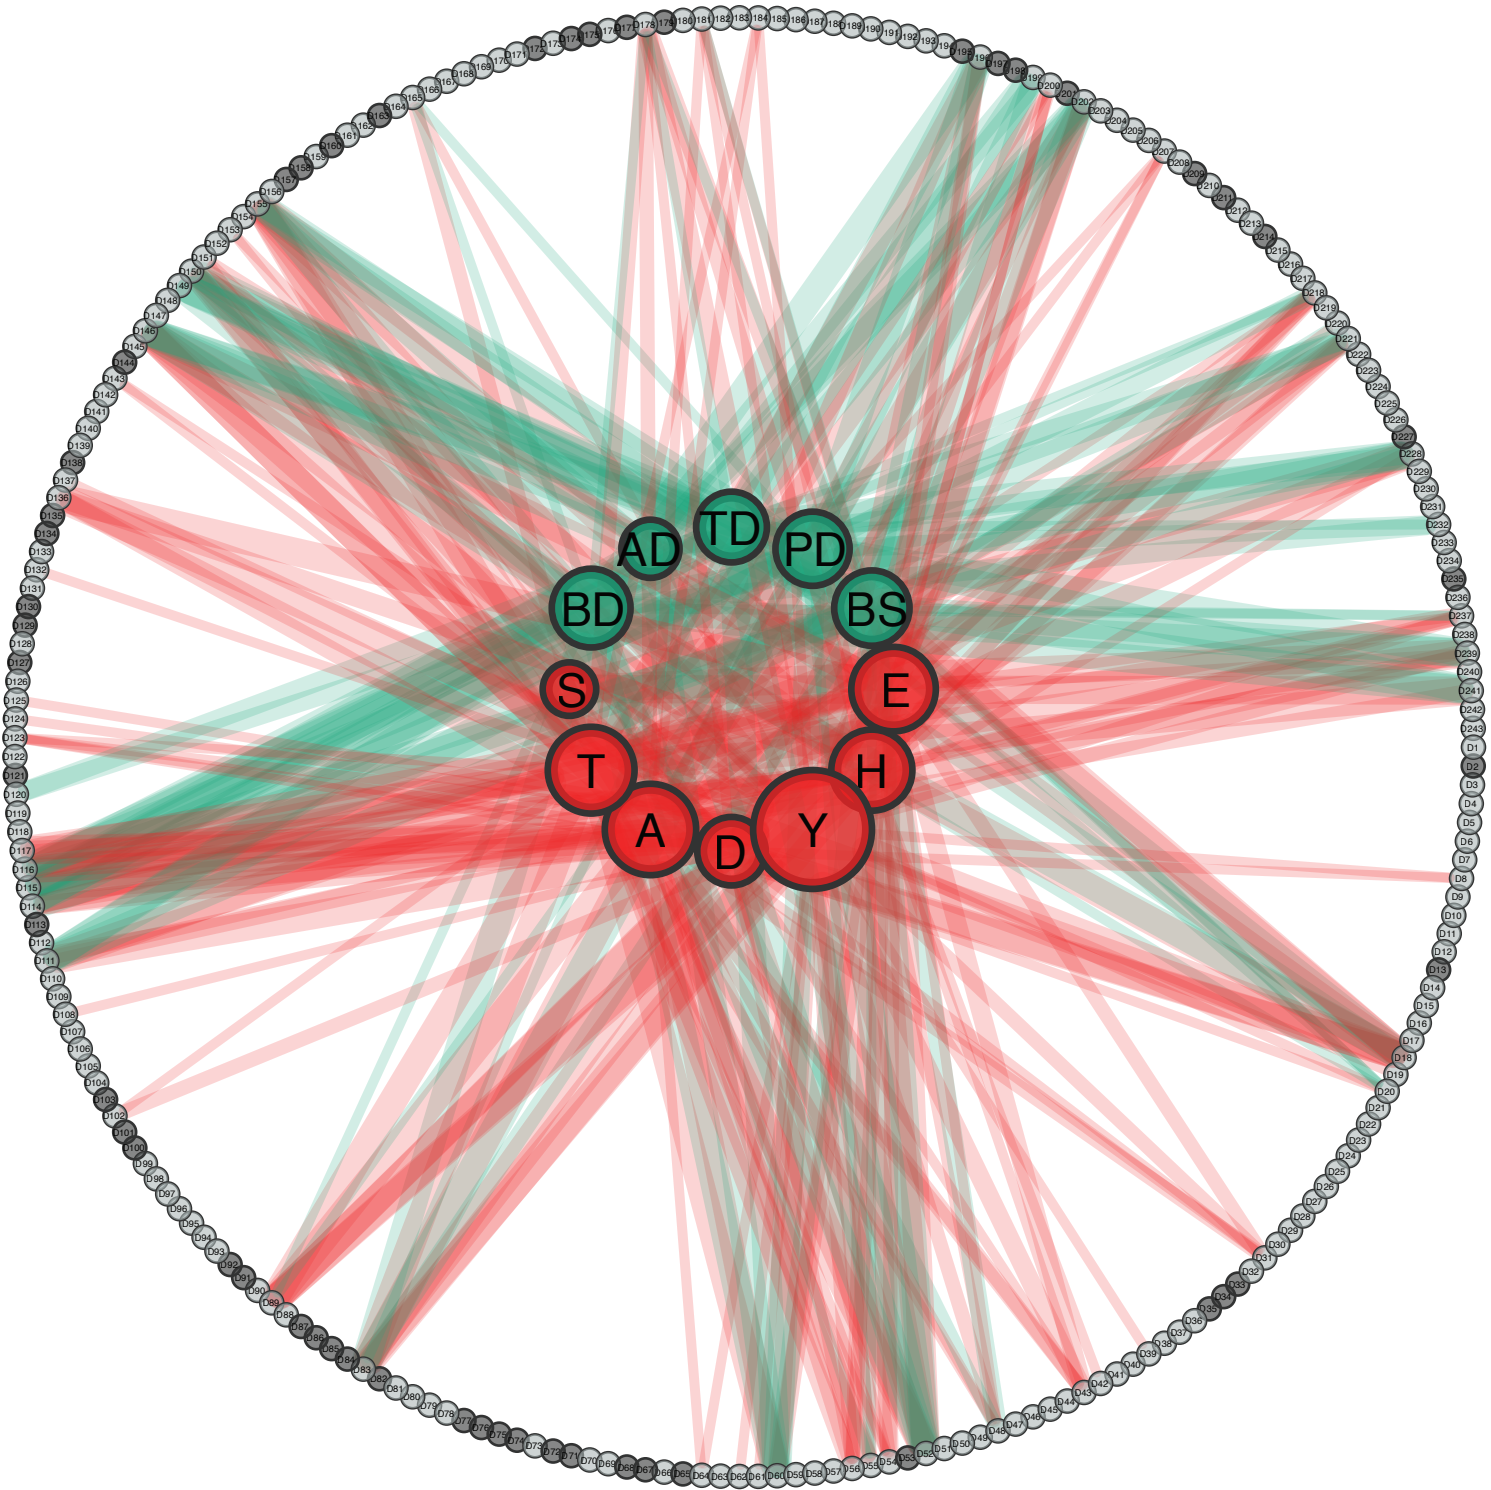

**Supplementary figure 16. Network visualisation of phenotypic parameters *her1* mutant, 50  $\mu$ M**

Phenotypic scoring per small molecule concentration illustrated as interaction networks. Inner circles represent phenotypic parameters, with morphology in green and segmentation in red. The size of nodes represents the frequency of scoring >0 for the individual parameter. Interactions to the outer circle represent the scoring of a phenotypic parameter to the associated small molecule treatment (grey circles). A legend of corresponding small molecule names can be found in Supplementary Data 1. Thickness of the interaction lines reflects the magnitude of the score. Dark grey circles represent lethal conditions. The networks are presented with vector graphics, so the details of numbers and interactions can be seen by zooming in.



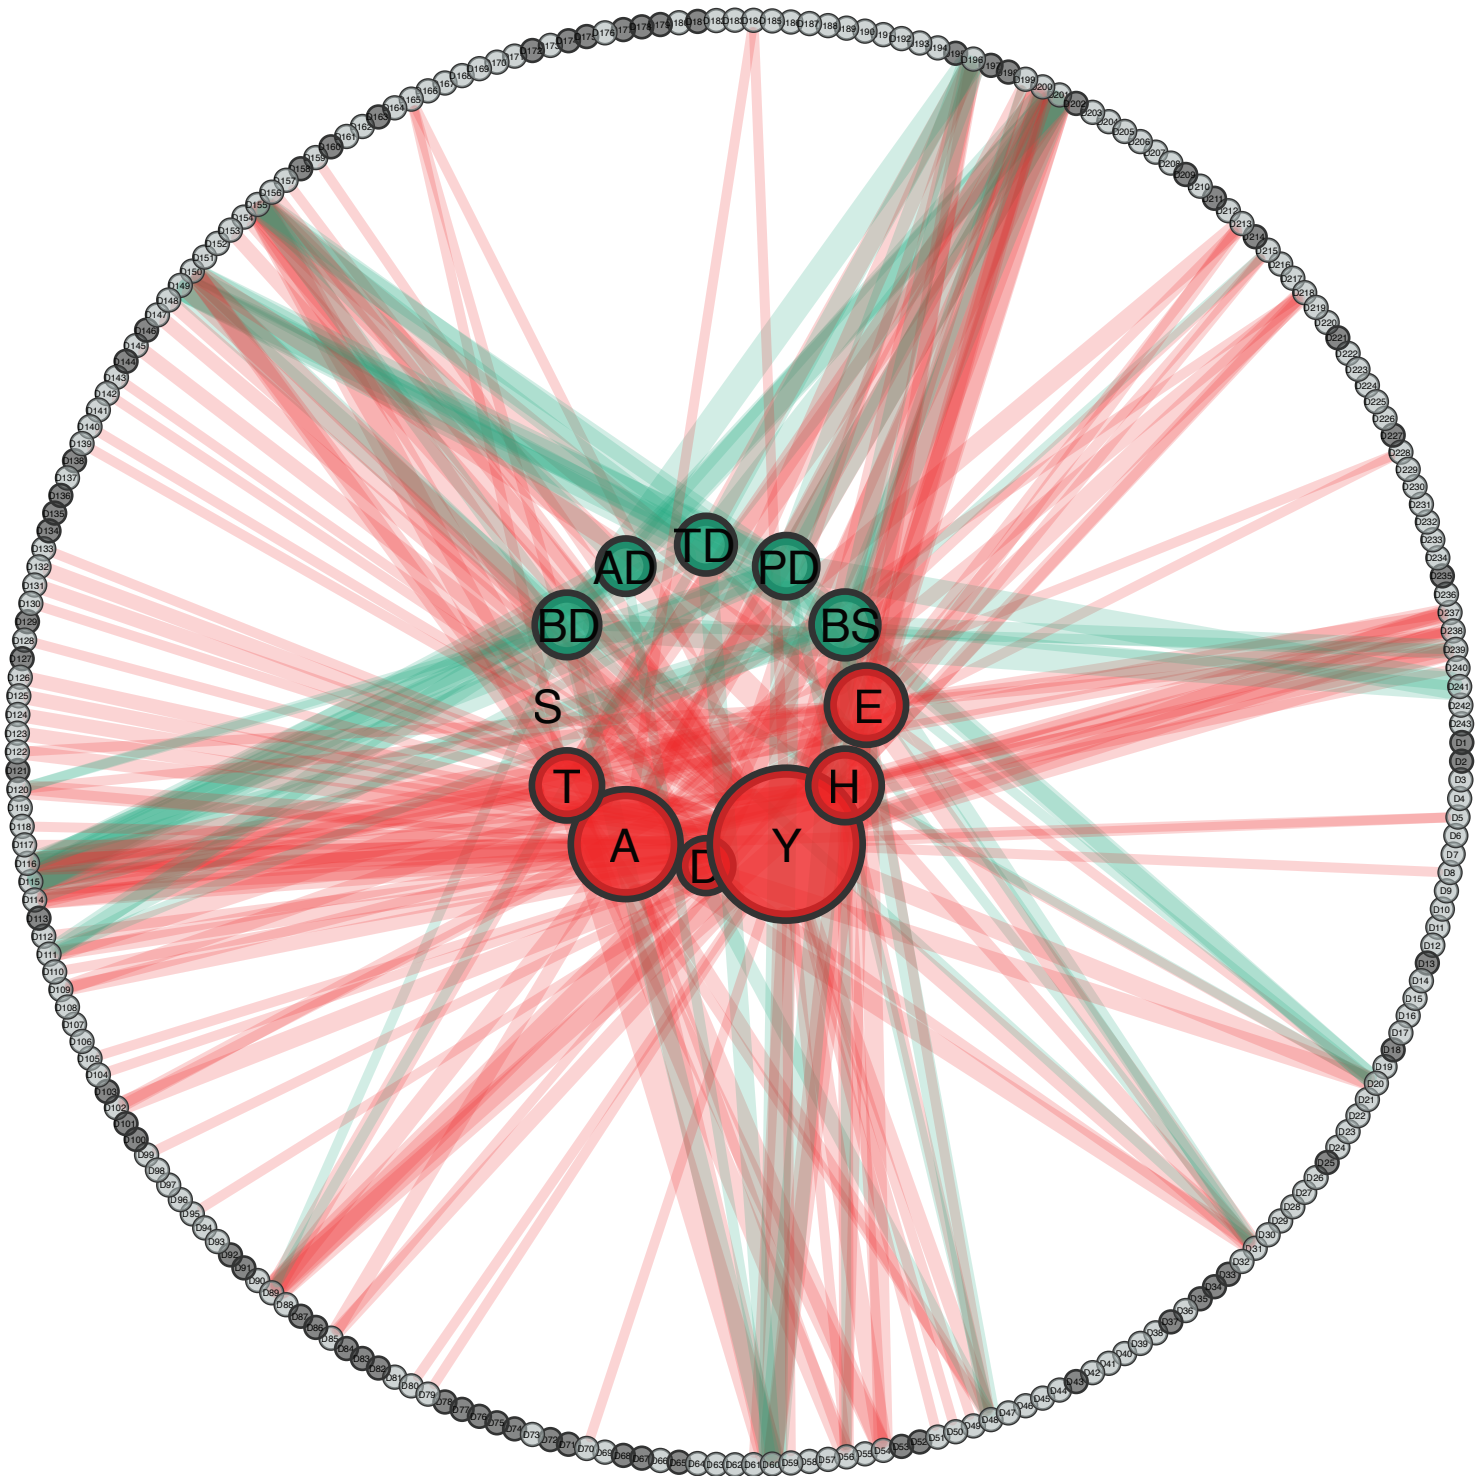

**Supplementary figure 17. Network visualisation of phenotypic parameters *hes6* mutant, 50 $\mu$ M**

Phenotypic scoring per small molecule concentration illustrated as interaction networks. Inner circles represent phenotypic parameters, with morphology in green and segmentation in red. The size of nodes represents the frequency of scoring >0 for the individual parameter. Interactions to the outer circle represent the scoring of a phenotypic parameter to the associated small molecule treatment (grey circles). A legend of corresponding small molecule names can be found in Supplementary Data 1. Thickness of the interaction lines reflects the magnitude of the score. Dark grey circles represent lethal conditions. The networks are presented with vector graphics, so the details of numbers and interactions can be seen by zooming in.

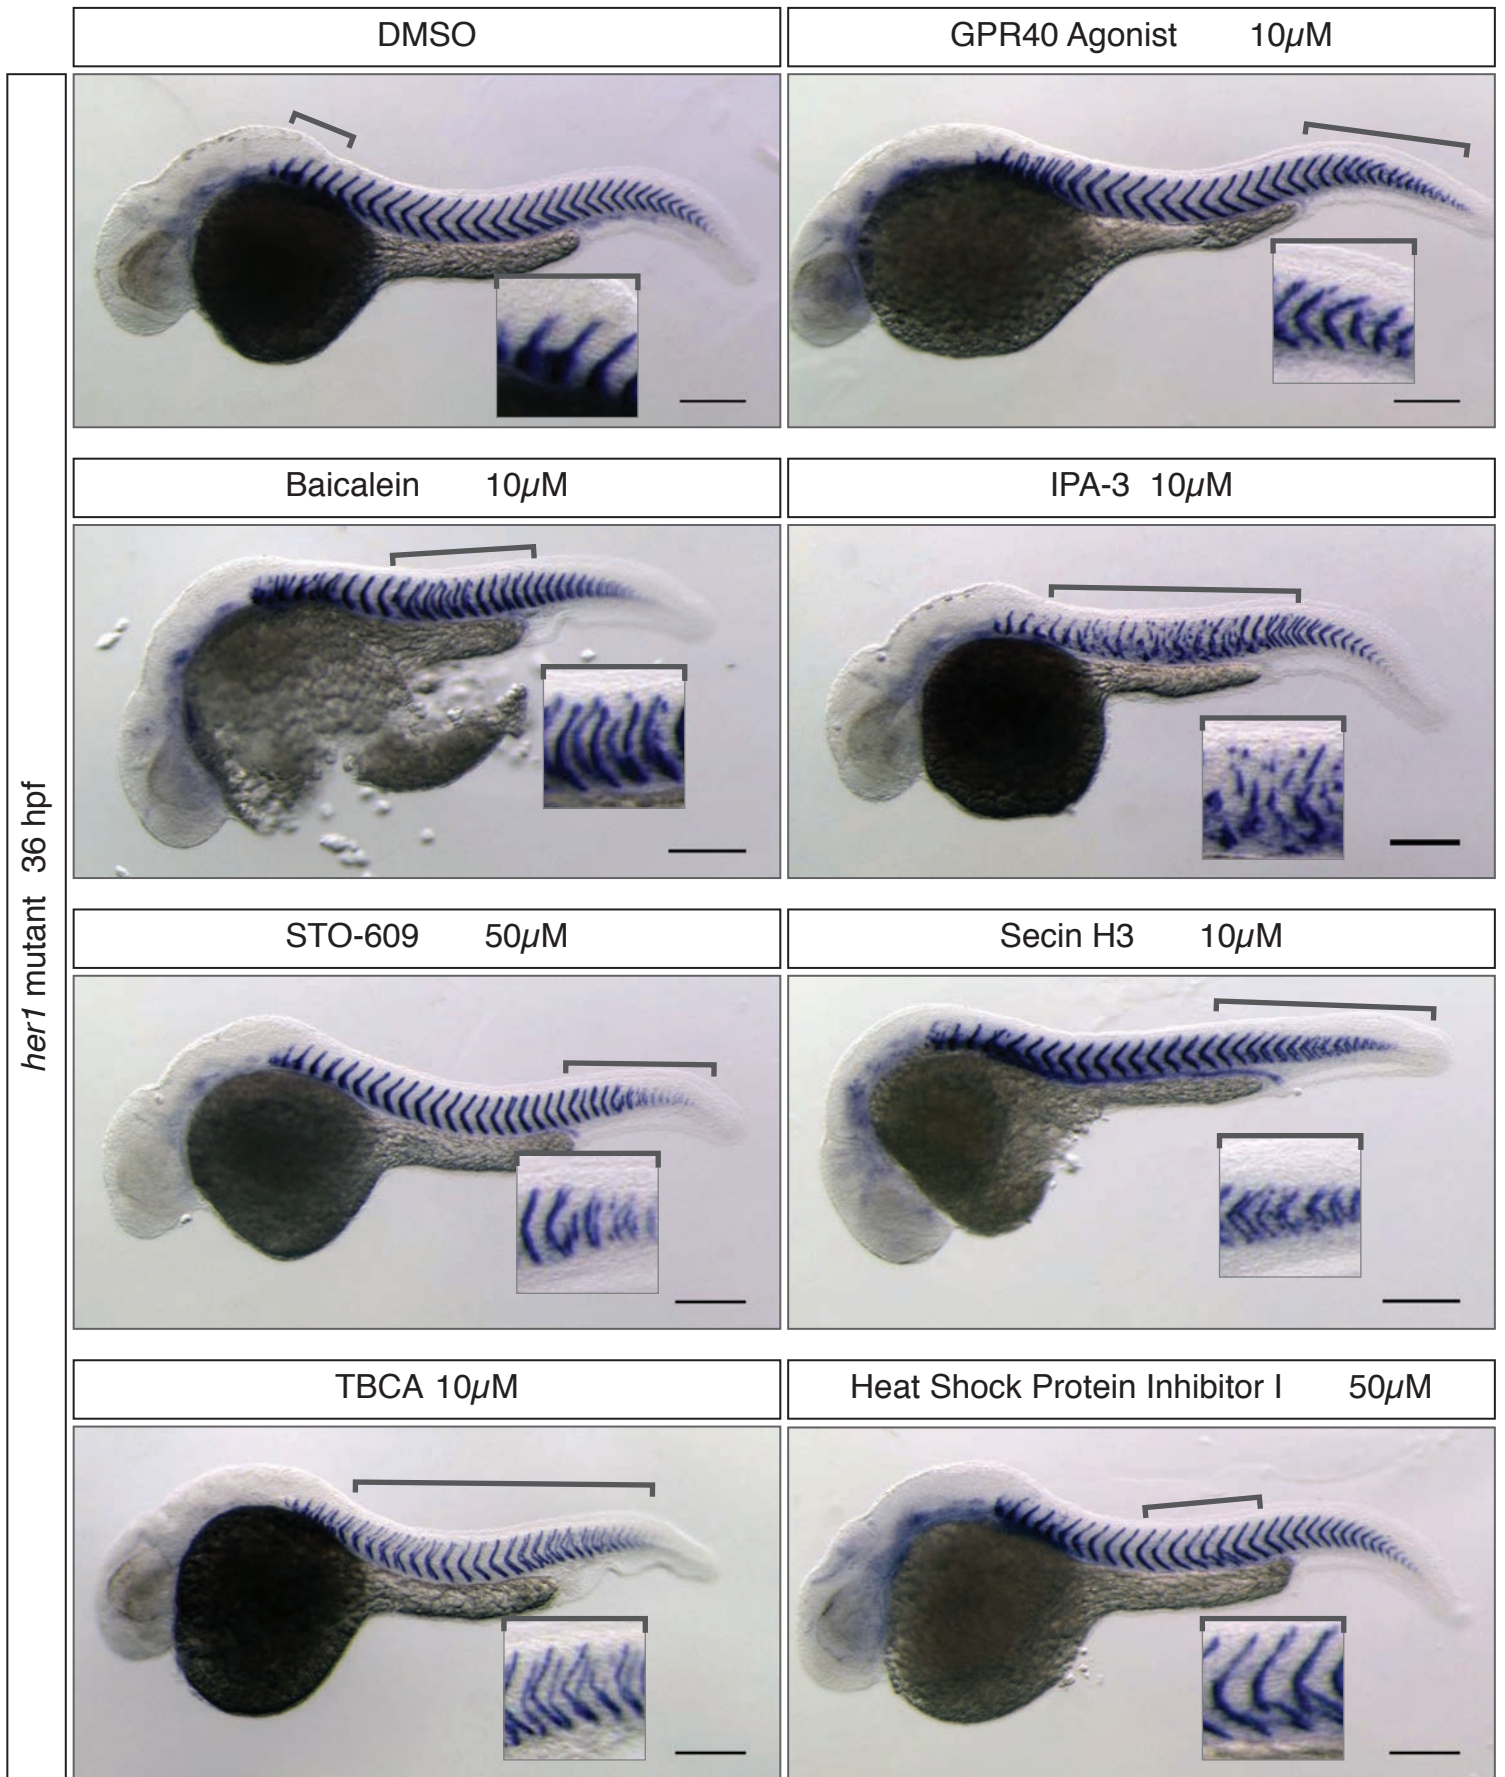

**Supplementary figure 18. Direct segmentation phenotypes from *her1* mutants**

Identified hit phenotypes with direct segmentation defects according the classification used in Table 1, visible at 36 hpf after *xirp2a in situ* hybridization, in a *her1* mutant background. All treatments are as labelled in the panel above the image. Anterior to the right, posterior to the left. Insets show zoom-in of the segment pattern and defects. Brackets indicate the area of the axis where segment boundary defects occurred.



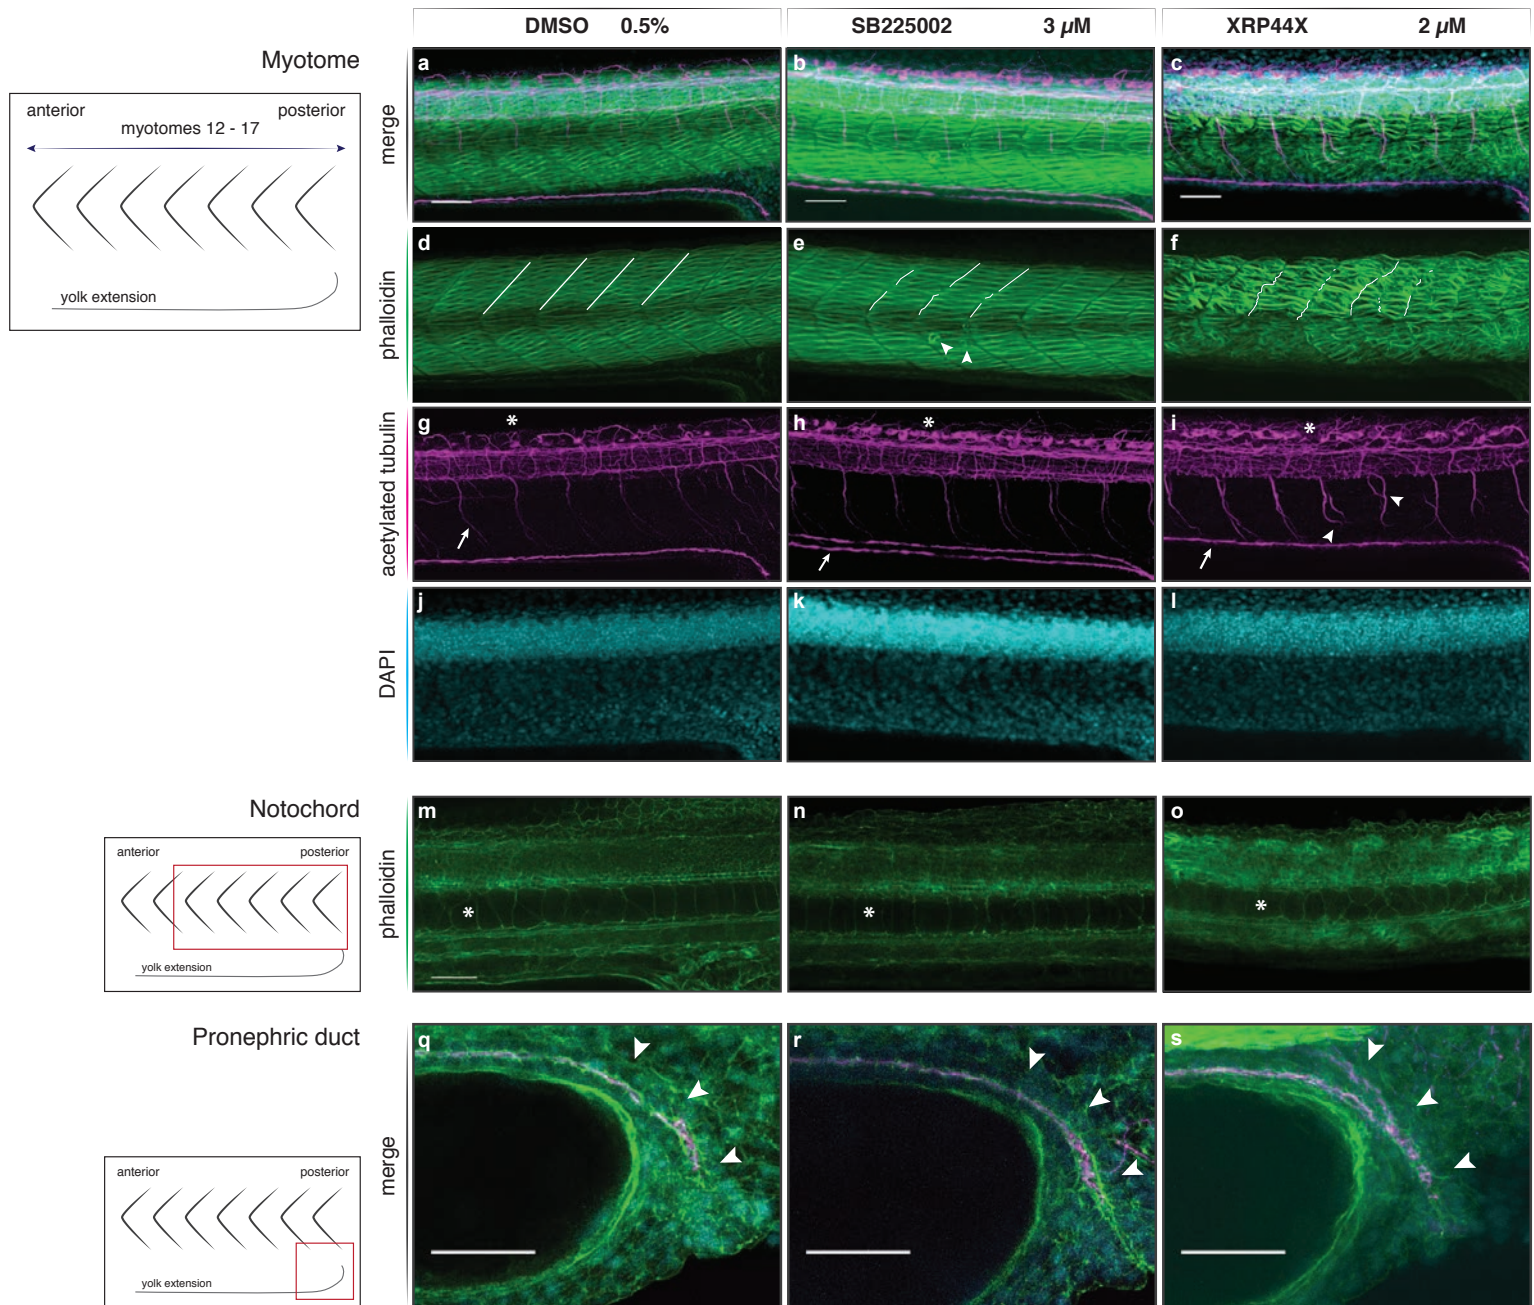

### Supplementary figure 19. Trunk myotomes, neurites, notochord and pronephric ducts in embryos treated with SB225002 and XRP44X

Confocal images of DMSO control and small molecule treated embryos at 36 hpf. F-actin visualized with phalloidin (green), acetylated tubulin by immunostaining (magenta) and nuclei with DAPI (cyan). Scale bar is 50  $\mu$ m. **(a-c)** Trunk section through myotomes 12 to 17. Myotomes show F-actin organized in skeletal muscle fibres of the DMSO control **(d)**. Muscle fibres are straight and span each myotome from the anterior to the posterior vertical border, highlighted as white lines. **(e)** In 3  $\mu$ M SB225002 treated embryos, some vertical myotome borders are discontinuous and less straight (white lines). Occasional appearance of round muscle cells and disorganized structures (arrowheads) in myotomes. **(f)** Thicker and shorter muscle fibres in 2  $\mu$ M XRP44X treated embryos. Muscle fibre structure is disorganized; vertical myotome boundary pattern is disrupted (white lines). **(g-i)** Neurons of the peripheral nervous system (asterisks) and pronephric ducts (arrows) developed and extended along the axis in control and small molecule treatments. Ventral axons of primary motor neurons are bent and shorter in XRP44X treated embryos **(i, arrowheads)** compared to DMSO control. **(j-l)** Nuclei show a high density at the level of the spinal cord throughout all tested conditions. **(m-o)** Cells of the notochord all have vacuoles and are densely packed in control and drug-treated embryos (asterisks). **(q-s)** Normal extension of the pronephric ducts until the posterior end of the yolk extension towards the developing anus (arrowheads).



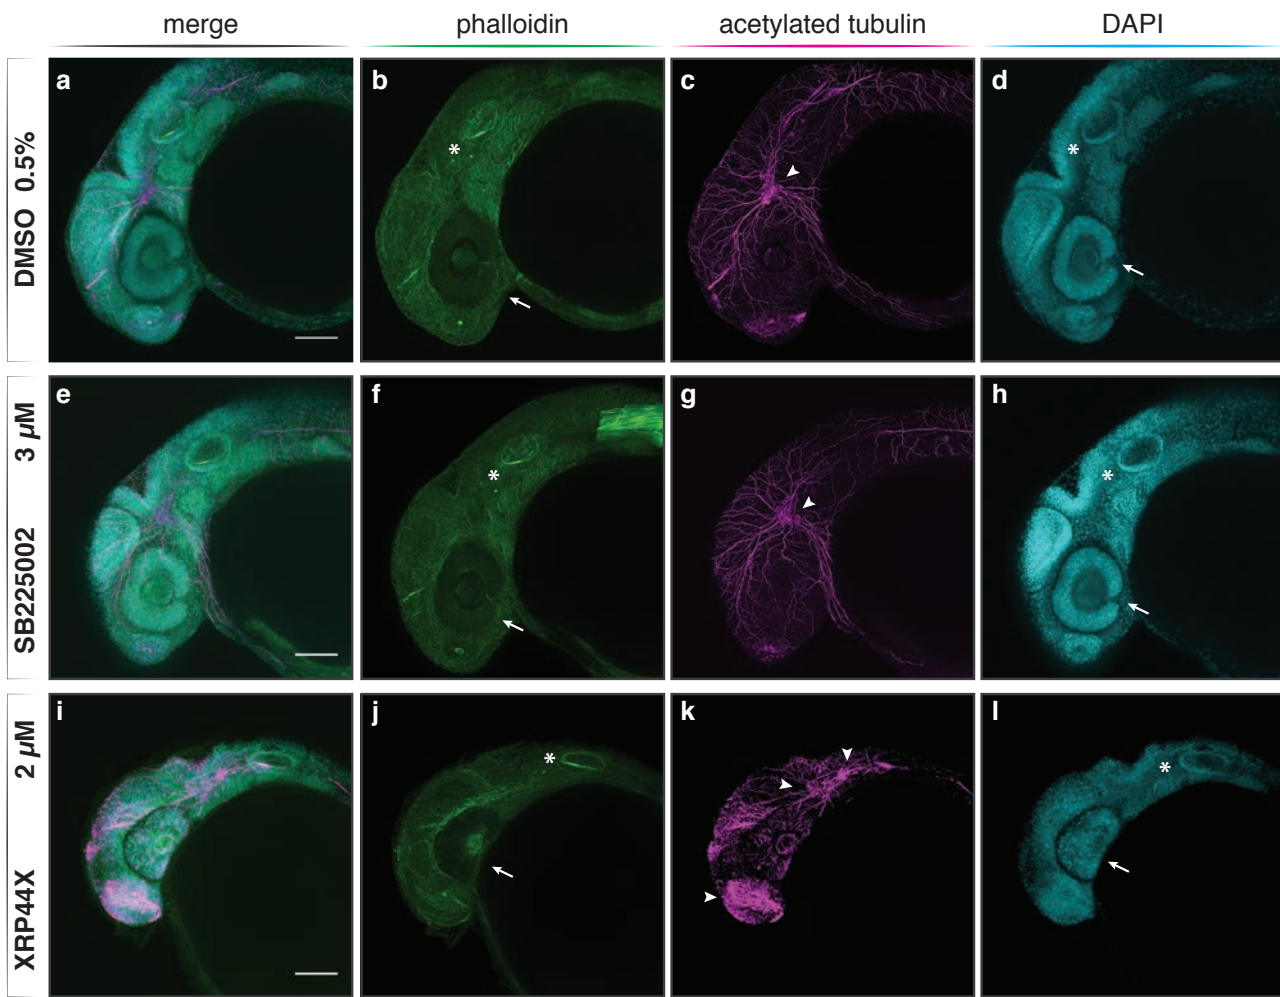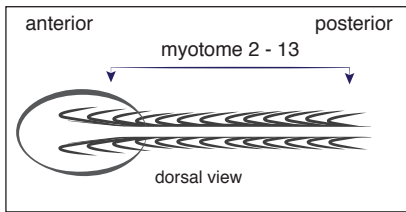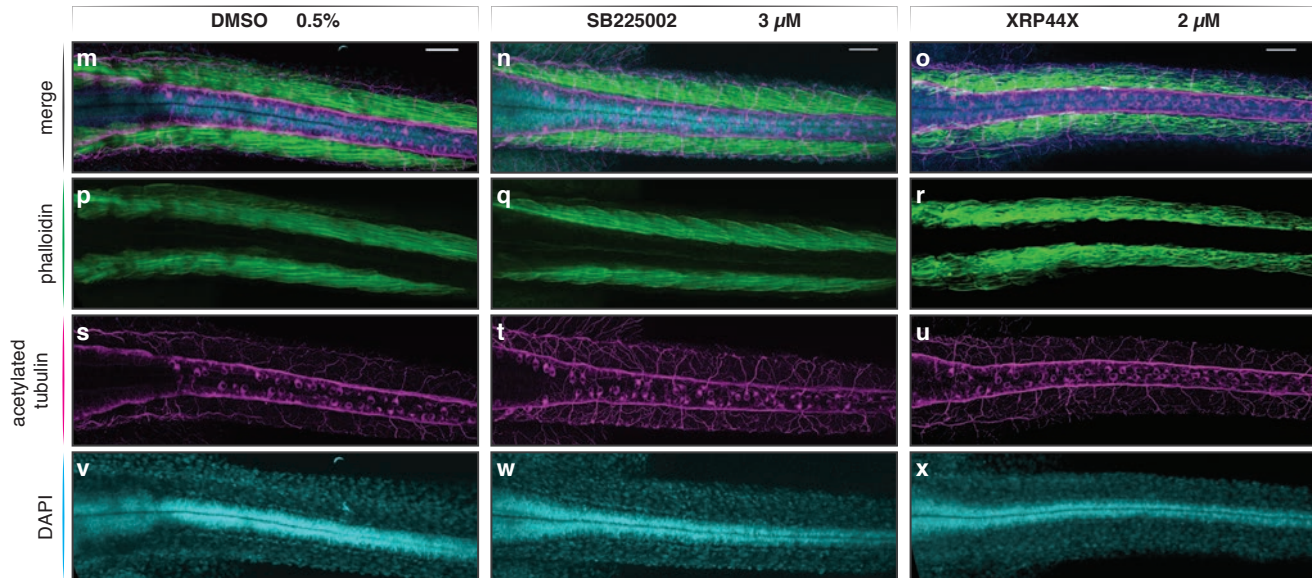

### Supplementary figure 20. Head structures, neurites and dorsal view of trunk in SB225002 and XRP44X treated embryos

Confocal images of DMSO control and small molecule treated embryos at 36 hpf. F-actin visualized with phalloidin (green), acetylated tubulin by immunostaining (magenta) and nuclei with DAPI (cyan). (a-l) Maximum projection of a stack of confocal sections of the lateral head of DMSO control and small molecule treated embryos. Scale bar is 100 μm. Control (a-d) and SB225002 (e-h) treated embryos show comparable development of main organs and tissue of the head: eyes with lens and retina (arrows), otic vesicles (asterisks) and neurons of the central nervous system (arrowheads). XRP44X treatment (i-l) led to a reduced eye size and loss of the ventral fissure (j), abnormal distribution of acetylated tubulin and accumulation in the head, developing mouth and olfactory organs (asterisks, k). (m-x) Maximum projection of a stack of confocal sections of the dorsal trunk area of DMSO control and small molecule treated embryos. Scale bar is 50 μm. Individual myotome structure is visible in DMSO and SB225002 treated embryos (p,q), but is less organised in XRP44X treatments (r) where individual myotomes are not detectable. (s-u) Neurons of the peripheral nervous system developed all along the anterior posterior axis in control embryos and all treatments. (v-x) Nuclei along the axis show a comparable distribution of cells between control and drug treatments.

Supplementary Table 1 Modified SSMD ranking for hit selection

| Rank | SSMD         | Drug name                                  | Concentration | Genotype    |
|------|--------------|--------------------------------------------|---------------|-------------|
| 1    | 1.58113883   | gamma-Secretase Inhibitor XXI, Compound E  | 50            | wtA         |
| 2    | 1.46642644   | Ras-Net (Elk-3) Pathway Inhibitor, XRP44X  | 2             | Her1 mutant |
| 3    | 1.392115116  | p21-Activated Kinase Inhibitor III, IPA-3  | 50            | Her1 mutant |
| 4    | 1.290994449  | gamma-Secretase Inhibitor XXI, Compound E  | 50            | Her1 mutant |
| 5    | 1.290994449  | gamma-Secretase Inhibitor XXI, Compound E  | 10            | Her1 mutant |
| 6    | 1.290994449  | DAPT                                       | 50            | wtB         |
| 7    | 1.290994449  | DAPT                                       | 50            | Hes6 mutant |
| 8    | 1.280150626  | DAPT                                       | 50            | wtA         |
| 9    | 1.245504738  | DAPT                                       | 50            | Her1 mutant |
| 10   | 1.219875091  | DAPT                                       | 50            | Her1 mutant |
| 11   | 1.219875091  | DAPT                                       | 50            | Her1 mutant |
| 12   | 1.219875091  | DAPT                                       | 50            | wtB         |
| 13   | 1.219875091  | DAPT                                       | 50            | wtA         |
| 14   | 1.219875091  | TGF- $\beta$ RI Kinase Inhibitor           | 50            | Her1 mutant |
| 15   | 1.187339225  | DAPT                                       | 50            | Hes6 mutant |
| 16   | 1.177621524  | p21-Activated Kinase Inhibitor III, IPA-3  | 10            | Her1 mutant |
| 17   | 1.173691195  | PKR Inhibitor                              | 2             | Her1 mutant |
| 18   | 1.146159971  | GSK-3 Inhibitor IX                         | 10            | wtB         |
| 19   | 1.144344271  | SB 225002                                  | 10            | Her1 mutant |
| 20   | 1.107018607  | DAPT                                       | 50            | wtA         |
| 21   | 1.100963765  | DAPT                                       | 50            | Hes6 mutant |
| 22   | 1.088214375  | gamma-Secretase Inhibitor XXI, Compound E  | 10            | wtA         |
| 23   | 1.05193031   | DAPT                                       | 50            | wtB         |
| 24   | 1.050525394  | gamma-Secretase Inhibitor XXI, Compound E  | 50            | Hes6 mutant |
| 25   | 1.020620726  | gamma-Secretase Inhibitor XXI, Compound E  | 50            | wtB         |
| 26   | 0.99796541   | Ras-Net (Elk-3) Pathway Inhibitor, XRP44X  | 2             | Hes6 mutant |
| 27   | 0.996023841  | PP2                                        | 10            | wtB         |
| 28   | 0.935276002  | PP2                                        | 2             | Hes6 mutant |
| 29   | 0.87774726   | Casein Kinase II Inhibitor III, TBCA       | 10            | Her1 mutant |
| 30   | 0.84757938   | STO-609                                    | 50            | Her1 mutant |
| 31   | 0.84757938   | GPR30 Agonist, G-1                         | 10            | wtA         |
| 32   | 0.845511689  | LY-83583                                   | 2             | Hes6 mutant |
| 33   | 0.811543068  | MEK1,2 Inhibitor II                        | 10            | Her1 mutant |
| 34   | 0.759554525  | Syk Inhibitor III                          | 50            | wtA         |
| 35   | 0.747904226  | Ras-Net (Elk-3) Pathway Inhibitor, XRP44X  | 2             | wtA         |
| 36   | 0.7290038    | Wee1 Inhibitor                             | 50            | Hes6 mutant |
| 37   | 0.645497224  | Heat Shock Protein Inhibitor I             | 50            | Her1 mutant |
| 38   | 0.621164027  | Wee1 Inhibitor                             | 50            | wtB         |
| 39   | 0.617540227  | LY-83583                                   | 2             | wtB         |
| 40   | 0.599329127  | JAK3 Inhibitor VI                          | 2             | Her1 mutant |
| 41   | 0.597614305  | AG-879                                     | 10            | Hes6 mutant |
| 42   | 0.593305566  | Wee1 Inhibitor                             | 50            | Her1 mutant |
| 43   | 0.580917864  | Ras-Net (Elk-3) Pathway Inhibitor, XRP44X  | 2             | wtB         |
| 44   | 0.564932683  | gamma-Secretase Inhibitor XXI, Compound E  | 10            | wtB         |
| 45   | 0.520156487  | GPR30 Agonist, G-1                         | 50            | wtB         |
| 46   | 0.476731295  | GPR30 Agonist, G-1                         | 50            | Hes6 mutant |
| 47   | 0.450225169  | MEK1,2 Inhibitor II                        | 10            | wtB         |
| 48   | 0.43335139   | PP2                                        | 50            | wtB         |
| 49   | 0.42447636   | GPR30 Agonist, G-1                         | 50            | Her1 mutant |
| 50   | 0.40824829   | SB 225002                                  | 10            | wtA         |
| 51   | 0.391230398  | GSK-3 Inhibitor IX                         | 50            | Her1 mutant |
| 52   | 0.359721539  | PP2                                        | 10            | Her1 mutant |
| 53   | 0.358057437  | GPR40 Agonist                              | 10            | Her1 mutant |
| 54   | 0.352297424  | JAK3 Inhibitor VI                          | 2             | wtB         |
| 55   | 0.351104204  | SB 225002                                  | 10            | wtB         |
| 56   | 0.350643437  | PP2                                        | 10            | Hes6 mutant |
| 57   | 0.350643437  | Aristolochic acid                          | 50            | Her1 mutant |
| 58   | 0.334472938  | Bafilomycin A1                             | 10            | Her1 mutant |
| 59   | 0.329690237  | MEK1,2 Inhibitor II                        | 10            | Hes6 mutant |
| 60   | 0.320530382  | PP2                                        | 2             | Her1 mutant |
| 61   | 0.315723013  | SecinH3                                    | 10            | Her1 mutant |
| 62   | 0.314436093  | SC-68376                                   | 50            | Her1 mutant |
| 63   | 0.314140431  | PP2                                        | 50            | Her1 mutant |
| 64   | 0.307031719  | MEK Inhibitor I                            | 50            | wtA         |
| 65   | 0.30429031   | 17-Allylamino-geldanamycin                 | 10            | wtA         |
| 66   | 0.297044263  | FGF Receptor Tyrosine Kinase Inhibitor     | 50            | wtA         |
| 67   | 0.294457471  | Wee1 Inhibitor                             | 50            | wtA         |
| 68   | 0.288675135  | STO-609                                    | 50            | wtB         |
| 69   | 0.286958518  | Lck Inhibitor                              | 10            | Her1 mutant |
| 70   | 0.25819889   | GSK-3 Inhibitor IX                         | 10            | wtA         |
| 71   | 0.25819889   | PP2                                        | 50            | wtA         |
| 72   | 0.256917498  | PKR Inhibitor                              | 2             | wtB         |
| 73   | 0.253184842  | PP2                                        | 2             | wtA         |
| 74   | 0.243975018  | 1-Azakenpaulone                            | 10            | Her1 mutant |
| 75   | 0.221403721  | SIRT1,2 Inhibitor VIII, Salermide          | 50            | wtB         |
| 76   | 0.20359485   | MEK1,2 Inhibitor II                        | 2             | wtB         |
| 77   | 0.200401204  | Lck Inhibitor                              | 50            | Her1 mutant |
| 78   | 0.176409557  | JAK3 Inhibitor VI                          | 10            | Hes6 mutant |
| 79   | 0.157851017  | SC-68376                                   | 50            | wtA         |
| 80   | 0.149181744  | Lck Inhibitor                              | 50            | wtA         |
| 81   | 0.148087219  | Cyclopamine                                | 10            | wtB         |
| 82   | 0.142566487  | Roscovitine                                | 50            | wtB         |
| 83   | 0.140028008  | FGF Receptor Tyrosine Kinase Inhibitor     | 50            | Hes6 mutant |
| 84   | 0.130410133  | FGF Receptor Tyrosine Kinase Inhibitor     | 10            | Her1 mutant |
| 85   | 0.121446542  | Cyclopamine                                | 50            | wtB         |
| 86   | 0.113227703  | GPR40 Agonist                              | 50            | Her1 mutant |
| 87   | 0.104031297  | 17-Allylamino-geldanamycin                 | 10            | Hes6 mutant |
| 88   | 0.090834052  | Lck Inhibitor                              | 10            | wtB         |
| 89   | 0.087437177  | SU-5402                                    | 50            | wtA         |
| 90   | 0.085875673  | FGF Receptor Tyrosine Kinase Inhibitor     | 50            | Her1 mutant |
| 91   | 0.081649658  | 1-Azakenpaulone                            | 10            | wtB         |
| 92   | 0.070220841  | MEK Inhibitor I                            | 50            | wtB         |
| 93   | 0.070220841  | TNF-alpha Antagonist III, R-7050           | 50            | wtB         |
| 94   | 0.063144603  | FGF Receptor Tyrosine Kinase Inhibitor     | 2             | wtB         |
| 95   | 0.056943324  | Bafilomycin A1                             | 10            | Hes6 mutant |
| 96   | 0.054849098  | MEK1,2 Inhibitor II                        | 10            | wtA         |
| 97   | 0.051598516  | VEGF Receptor Tyrosine Kinase Inhibitor II | 50            | wtA         |
| 98   | 0.044919442  | SU-5402                                    | 10            | Her1 mutant |
| 99   | 0            | Aristolochic acid                          | 50            | Hes6 mutant |
| 100  | 0            | Baicalin                                   | 2             | wtB         |
| 101  | 0            | Bay 11-7082                                | 2             | wtB         |
| 102  | 0            | Cyclopamine                                | 2             | wtB         |
| 103  | 0            | PKR Inhibitor                              | 2             | wtA         |
| 104  | 0            | Lck Inhibitor                              | 10            | wtA         |
| 105  | 0            | JAK3 Inhibitor VI                          | 2             | wtA         |
| 106  | 0            | FGF Receptor Tyrosine Kinase Inhibitor     | 10            | wtA         |
| 107  | 0            | Manumycin A                                | 10            | wtA         |
| 108  | 0            | SP-600125                                  | 2             | wtA         |
| 109  | -0.056943324 | Z-Guggulsterone                            | 50            | Her1 mutant |
| 110  | -0.0747853   | Baicalin                                   | 10            | Her1 mutant |
| 111  | -0.099014754 | Diacylglycerol Kinase Inhibitor II         | 50            | Her1 mutant |
| 112  | -0.102062073 | A77 1726                                   | 10            | wtB         |
| 113  | -0.114108866 | Lck Inhibitor                              | 50            | Hes6 mutant |
| 114  | -0.119865825 | IKK Inhibitor X                            | 50            | wtA         |
| 115  | -0.121987509 | p38 MAP Kinase Inhibitor                   | 50            | Her1 mutant |
| 116  | -0.142566487 | SC-68376                                   | 50            | wtB         |
| 117  | -0.162221421 | 17-Allylamino-geldanamycin                 | 10            | Her1 mutant |
| 118  | -0.169515876 | PP2                                        | 10            | wtA         |
| 119  | -0.18590915  | TNF-alpha Antagonist III, R-7050           | 50            | Hes6 mutant |
| 120  | -0.208062595 | A77 1726                                   | 10            | Her1 mutant |

**Supplementary Table 2** Mean difference of segmentation and morphology parameters for hit selection

| Drug name                                     | 2 $\mu$ M |       |             |             | 10 $\mu$ M |       |             |             | 50 $\mu$ M |       |             |             |
|-----------------------------------------------|-----------|-------|-------------|-------------|------------|-------|-------------|-------------|------------|-------|-------------|-------------|
|                                               | wt_A      | wt_B  | her1 mutant | hes6 mutant | wt_A       | wt_B  | her1 mutant | hes6 mutant | wt_A       | wt_B  | her1 mutant | hes6 mutant |
| 1-Azakenpaulone                               |           | 0.083 | 0.083       |             |            | 0.083 | 0.333       |             |            |       |             |             |
| 17-Allylamino-geldanamycin                    |           |       |             |             | 0.500      |       |             | 0.167       |            |       |             |             |
| Aristolochic acid                             |           |       |             |             |            |       |             |             |            |       | 0.250       |             |
| Bafilomycin A1                                |           |       |             |             |            |       | 0.583       | 0.083       |            |       |             |             |
| Casein Kinase II Inhibitor III, TBCA          |           |       |             |             |            |       | 1.167       |             |            |       |             |             |
| Cyclopamine                                   |           |       |             |             |            | 0.167 |             |             |            | 0.167 |             |             |
| FGF Receptor Tyrosine Kinase Inhibitor        |           | 0.083 |             |             |            | 0.333 | 0.167       |             | 0.500      | 0.333 | 0.167       | 0.167       |
| GPR30 Agonist, G-1                            |           |       |             |             | 0.833      |       |             |             |            | 0.833 | 0.667       | 0.750       |
| GPR40 Agonist                                 |           |       |             |             |            |       | 0.333       |             |            |       | 0.167       |             |
| GSK-3 Inhibitor IX                            |           |       |             |             | 0.167      | 1.583 |             |             |            |       | 0.500       |             |
| Heat Shock Protein Inhibitor I                |           |       |             |             |            |       |             |             |            |       | 0.667       |             |
| JAK3 Inhibitor VI                             |           | 0.583 | 0.833       |             |            |       |             |             |            |       |             | 0.250       |
| LY-83583                                      |           | 0.750 |             | 1.083       |            |       |             |             |            |       |             |             |
| Lck Inhibitor                                 |           |       |             |             |            | 0.083 | 0.417       |             | 0.250      |       | 0.333       |             |
| MEK Inhibitor I                               |           |       |             |             |            |       |             |             | 0.417      | 0.083 |             |             |
| MEK1/2 Inhibitor II                           |           | 0.250 |             |             | 0.083      | 0.500 | 1.167       | 0.250       |            |       |             |             |
| PKR Inhibitor                                 |           | 0.333 | 1.500       |             |            | 0.333 |             |             |            |       |             |             |
| PP2                                           | 0.167     | 0.083 | 0.250       | 1.083       |            | 1.250 | 0.417       | 0.500       | 0.333      | 0.667 | 0.500       |             |
| Ras-Net (Elk-3) Pathway Inhibitor, XRP44X     | 1.167     | 0.583 | 1.917       | 1.167       |            |       |             |             |            |       |             |             |
| SB 225002                                     |           |       |             |             | 0.667      | 0.417 | 1.833       |             |            |       |             |             |
| SC-68376                                      |           |       |             |             | 0.167      |       |             |             | 0.250      |       | 0.583       |             |
| STO-609                                       |           |       |             |             |            |       |             |             | 0.167      | 0.167 | 0.833       |             |
| SecinH3                                       |           |       |             |             |            |       | 0.417       |             |            |       |             |             |
| TGF- $\beta$ RI Kinase Inhibitor              |           |       |             |             | 0.167      |       |             |             |            |       | 1.667       |             |
| Wee1 Inhibitor                                |           |       |             |             |            |       |             |             | 0.500      | 1.083 | 1.167       | 1.083       |
| p21-Activated Kinase Inhibitor III, IPA-3     |           |       |             |             |            |       | 1.750       |             |            |       | 1.667       |             |
| $\gamma$ -Secretase Inhibitor XXI, Compound E |           |       |             |             | 1.500      | 1.000 | 2.000       |             | 2.000      | 1.667 | 2.000       | 1.750       |
| AG-879                                        |           |       |             |             |            |       |             | 0.500       |            |       |             |             |
| DAPT_1                                        |           |       |             |             |            |       |             |             | 1.667      | 1.500 | 1.667       | 1.333       |
| DAPT_2                                        |           |       |             |             |            |       |             |             | 1.667      | 1.667 | 1.667       | 1.250       |
| DAPT_3                                        |           |       |             |             |            |       |             |             | 1.917      | 2.000 | 1.833       | 0.667       |
| Roscovitine                                   |           |       |             |             |            |       |             |             |            | 0.167 |             |             |
| SIRT1/2 Inhibitor VIII, Salermide             |           |       |             |             |            |       |             |             |            | 0.167 |             |             |
| SU5402_2                                      |           |       |             |             |            |       | 0.083       |             | 0.167      |       |             |             |
| Syk Inhibitor III                             |           |       |             |             |            |       |             |             | 0.500      |       |             |             |
| TNF- $\alpha$ Antagonist III, R-7050          |           |       |             |             |            |       |             |             |            | 0.083 |             |             |
| VEGF Receptor Tyrosine Kinase Inhibitor II    |           |       |             |             |            |       |             |             | 0.083      |       |             |             |
| Apoptosis Inhibitor II, NS3694                |           |       |             | 0.167       |            |       |             |             |            |       |             |             |
| E3 medium_21                                  |           | 0.083 |             |             |            |       |             |             |            |       |             |             |
| E3 medium_29                                  |           |       |             |             |            | 0.083 |             |             |            |       |             |             |



**Supplementary Table 3** Genotyping primer sequences

|             | Primer name           | Primer sequence (5' to 3')                    | T <sub>m</sub> |
|-------------|-----------------------|-----------------------------------------------|----------------|
| <i>her1</i> | zf-her1-236-outer-for | TACGTCATTGACACCTCGTC                          | 57°C           |
|             | zf-her1-238-inner-for | CCATATAGTATTCCAGGTTGTGTC                      | 57°C           |
|             | zf-her1-239-inner-rev | TGTAAAACGACGGCCAGTGGTTTGCAAGGGACTTTAAC        | 57°C           |
|             | zf-her1-237-outer-rev | AGGAAACAGCTATGACCATGCTTACTTGTATAAGCTACAATTGAC | 57°C           |
| <i>hes6</i> | hes6-701-for          | AGCAACACTCACGACGAGGATTA                       | 55°C           |
|             | hes6-1522-rev         | CAGAACAAATGTCGTCGCTGGAG                       | 55°C           |
|             | 5'LTR-600             | AAGTCGGATGCAACTGCAAGAAGG                      | 57°C           |
